# Supplementary material
Source: Research Square preprint supplement (doi:10.21203/rs.3.rs-9478237/v1)
Supplement: Supplementary file 1 [file 815d54e65bfd9f4695683dd7.docx]

**Formulas related to data processing in this study：**

**1 entropy evaluation method**

1. Data Standardization

n：Number of evaluation objects (samples)

m：Number of evaluation indicators

X=(xij)n×m , i=1 , … , n ; j=1 , … , m

forward pointer ：

Negative indicators:

1. Apply the standardized value
2. Coefficient of Variation for the Calculation Indicator
3. Calculate metric weights
4. **Calculate the comprehensive score**

**2 Modified gravity model**

Where *Rij* denotes the potential spatial association strength from county *i* to county *j*; *Siu* represents the urban development capacity of county *i*, reflecting its ability to organize linkages and exert functional radiation within the urban-rural integration network; *Sjr* denotes the rural absorption capacity of county *j*, indicating its capacity to accommodate, transform, and embed within cross-regional linkages; *Dij* represents spatial resistance between counties *i* and *j*, capturing the cost of cross-regional interaction; *g* denotes the level of per capita economic scale, reflecting the supporting role of regional economic foundations in spatial linkages; and *Kij* is a correction coefficient for spatial association.

Using the average value per row of the corrected gravitational model calculation results (Rij) as the threshold, the original data were binarized to construct an annual urban-rural integration binary matrix. This matrix was then input into UCINET for social network analysis and QAP analysis.

**3**

The original calculation data of the QAP indicator system are standardized and converted into a matrix format. This matrix is then input into the UCINET software along with the annual urban-rural integration binary matrix for QAP analysis.
