# Supplementary material
Source: Research Square preprint supplement (doi:10.21203/rs.3.rs-9478237/v1)
Supplement: Supplementary file 2 [file a14d2273afa55583b325627b.xlsx]

## Sheet: County panel data
	Per capita disposable income of residents								GDP per capita								Value added of primary industry								Number of employment in primary industry								The output value of the city's secondary and tertiary industries								Number of employment in secondary and tertiary industries								Per capita savings level of residents
	2015	2016	2017	2018	2019	2020	2021	2022	2015	2016	2017	2018	2019	2020	2021	2022	2015	2016	2017	2018	2019	2020	2021	2022	2015	2016	2017	2018	2019	2020	2021	2022	2015	2016	2017	2018	2019	2020	2021	2022	2015	2016	2017	2018	2019	2020	2021	2022	2015
Yilan	2.1274	2.2249	2.3695	2.5029	2.6366	2.7702	2.9035	3.0361	5.0154	4.5962	4.0166	3.5798	2.8942	4.2161	4.6031	5.0462	488492	442390	237530	232292	260810	290030	304891	334356	90451	88572	90449	88575	90446	88578	90443	88581	1274337	1357766	1316074	1131911	835197	825534	861986	910284	37967	40972	41974	42784	44668	46361	47931	49430	1.67944
Fangzheng	1.9124	2.0418	2.1888	2.4656	2.7773	3.1283	3.5233	3.9681	2.991	3.0416	2.9355	2.9081	2.8264	3.5587	3.8619	4.3489	212488	219969	216016	231745	256563	274668	299080	349784	54920	54922	54922	54922	54922	54922	54922	54922	451703	472299	415112	412259	366752	386519	401203	424752	22566	23120	24536	24437	24621	24226	24326	24269	2.52848
Binxian	2.1692	2.3126	2.4699	2.6353	2.8057	2.9809	3.1606	3.3445	5.1405	5.5069	5.4568	5.3408	3.092	3.8568	4.0572	4.2826	493729	511666	401912	370904	394561	432677	438286	474305	143419	143421	143421	143421	143421	143421	143421	143421	2376438	2679716	2740665	2678362	1363264	1300642	1351455	1395468	144140	145698	154193	157877	158322	157525	157935	158329	1.53137
Bayan	2.0079	2.0673	2.1913	2.4372	2.7106	3.0146	3.3525	3.7281	2.249	2.8889	2.8555	2.7934	1.8324	2.8652	3.0771	3.3725	569278	569808	515411	363160	414394	458777	461897	484815	170805	170806	170806	170806	170806	170806	170806	170806	1247819	1356349	1363538	1447596	765554	768529	806997	869072	211852	190667	208880	197143	166166	159006	158983	159682	1.30055
Mulan	1.8122	1.9308	2.0679	2.3226	2.6086	2.9299	3.2907	3.6958	3.2521	3.178	3.2549	3.3175	3.234	4.5755	4.8817	5.309	240496	260694	237471	212651	242504	263946	269643	290390	85489	85633	85576	85599	85590	85593	85592	85592	524431	553103	588002	618033	561029	562916	571516	596210	36536	38363	36656	37736	32182	32740	32846	32592	1.37262
Tonghe	1.882	2.0079	2.1565	2.3694	2.5973	2.8406	3.0999	3.3756	2.9128	3.1464	4.095	3.293	3.67	4.8844	5.1568	5.595	217700	249036	467251	266047	311813	343597	356513	381366	43743	43815	43775	43797	43784	43791	43787	43797	459945	517480	537257	529584	548996	548727	552088	575933	34199	35629	36567	38461	36703	38344	40170	42152	1.71548
Yanshou	1.8245	1.9542	2.089	2.3394	2.6196	2.9332	3.2842	3.6771	3.1348	3.1601	2.7068	2.618	2.6024	3.6157	3.8782	4.1775	244795	240883	160707	143617	173032	186291	191161	205895	71055	70923	70982	70955	70968	70962	70965	70964	504378	558008	517348	504525	467140	485177	504911	525368	42961	31381	32953	34441	34557	35114	35381	35596	1.57291
Shangzhi	2.1778	2.3366	2.5002	2.6997	2.912	3.1377	3.3775	3.6318	5.2293	3.7763	3.7855	3.7933	3.2118	3.7991	4.0964	4.5241	593120	623392	556248	554357	607038	652073	702529	780861	105827	105826	105826	105826	105826	105826	105826	105826	1613622	1575403	1612868	1583006	1184708	1132894	1155593	1208844	194715	197153	174674	172186	171965	171722	171514	171349	2.23621
Wuchang	2.0546	2.2127	2.3742	2.6061	2.8587	3.1336	3.4325	3.7573	4.4342	4.4679	4.6581	4.5952	3.1393	3.8727	4.0943	4.3593	1001056	1047433	914586	959002	1028818	1113343	1145341	1232294	261178	261367	261451	261489	261505	261513	261516	261454	2881479	3053826	3182931	3173763	1783650	1719591	1775398	1814426	233470	233610	233267	232574	236896	235404	236354	235891	1.65422
Longjiang	1.6147	1.7421	1.8728	1.95	2.0268	2.103	2.1784	2.253	1.783	1.6338	2.2847	1.7256	1.9767	2.9909	3.282	3.4729	402903	381465	421890	450066	500445	577811	570736	648241	184022	184911	184079	184857	184130	184809	184174	184761	522969	588342	498879	554924	645252	681233	769870	754191	146270	146666	146701	144715	142891	142626	142773	142810	0.968728
Yian	1.8472	1.9743	2.1066	2.2783	2.4624	2.6598	2.8712	3.0976	1.5046	1.6093	1.3159	1.262	1.5342	2.0691	2.2056	2.325	311993	318025	284999	291142	340528	377906	379975	408008	172507	172844	172695	172761	172732	172745	172739	172748	423247	461101	339019	297465	371665	363888	389160	393081	77019	69597	70190	72413	73478	78764	77779	78146	1.11464
Tailai	1.544	1.6535	1.7676	1.8843	2.003	2.1234	2.2451	2.368	1.6615	1.5836	1.6386	1.7583	2.0172	2.5812	2.8144	3.0055	206868	221372	219604	230734	249854	294994	294752	321888	90557	90690	90799	90887	90958	91016	91063	91097	245442	273281	286717	304408	360825	351874	397435	409762	60392	60970	61345	62067	63235	63356	63847	64054	1.21113
Gannan	1.4959	1.6203	1.7499	1.9545	2.1829	2.438	2.7228	3.0407	1.5828	1.9499	2.0064	2.1389	2.2848	3.1198	3.2317	3.5348	339356	347110	374060	393583	402312	448428	442799	482167	133773	133771	133771	133771	133771	133771	133771	133816	344147	401972	412438	412054	452904	463357	473864	507250	38566	47650	35735	40964	47872	45609	45804	45783	1.70709
Fuyu	1.9794	2.1418	2.2939	2.4771	2.6718	2.8785	3.0975	3.3294	3.0522	2.4182	2.3862	2.5483	2.528	3.3216	3.6444	4.0837	317678	308640	268014	277329	316348	360675	352468	388316	84966	89052	85022	88994	85077	88938	85129	88745	348894	391661	413879	438674	389710	389797	451534	501084	77898	79055	79055	37442	36277	36367	36358	36360	1.69451
Keshan	1.8514	1.9754	2.1058	2.3565	2.6369	2.9504	3.3009	3.6928	1.7954	1.7175	1.4805	1.5541	1.4108	2.6208	2.7475	2.934	314322	334590	259059	265289	327608	345522	331036	350085	103162	101227	70549	70623	70592	94224	92641	93162	450738	487702	435448	451873	318593	339409	357075	373406	146309	148579	117880	117859	117340	154507	155883	157705	1.22247
Kedong	1.4129	1.5237	1.6349	1.7562	1.8834	2.0166	2.1558	2.3011	1.1674	1.5051	1.55	1.7239	1.8725	3.6584	4.3651	4.7995	140270	140502	140029	144801	159960	181132	173207	201130	70306	70726	99369	97585	95871	70605	70600	70593	253342	290788	297065	334386	357795	408957	501375	530989	105491	115080	149752	150832	152882	107976	101937	97933	1.39471
Baiquan	1.5181	1.6409	1.759	1.8873	2.0226	2.1652	2.3152	2.473	1.9261	1.517	1.5651	1.5437	1.1241	2.1772	2.3735	2.6246	338263	293122	268487	267882	287335	321922	319228	356254	217751	218583	219171	219588	219882	220090	220237	220366	592758	574271	612327	588369	332504	313057	339285	362020	48160	51700	52079	56878	50189	50485	49773	49177	0.877498
Nehe	2.0546	2.218	2.3777	2.5798	2.7938	3.02	3.2588	3.5103	1.4205	1.6902	1.6959	1.6806	1.7166	2.5434	2.5885	2.8949	374959	381292	431605	447244	496900	553663	543102	596276	193674	190178	191759	191039	191366	191217	191285	191253	729911	812358	741478	700509	669390	571015	570085	632500	111951	105036	103059	113301	112687	111653	111731	111499	1.27482
Linkou	2.1001	2.2365	2.3841	2.5237	2.6543	2.7757	2.888	2.9913	3.6287	2.929	2.9557	2.5965	2.0534	2.8899	3.1922	3.3831	389313	374031	354957	252311	275247	301188	320335	333000	90940	89436	88086	86874	85784	84802	83917	83921	637553	662306	677181	639151	412017	404608	428715	448612	127984	127841	113966	114895	117131	118667	119944	120744	1.74685
Suifenhe	3.0604	3.2685	3.4973	3.83	4.1942	4.5927	5.0288	5.506	10.383	13.4695	14.5313	14.4602	7.8722	4.3298	4.7611	5.4031	10053	11200	15838	14548	14028	13292	14381	16194	1311	1311	1310	1310	1310	1310	1310	1309	1311108	1357900	1470719	1464691	532039	488519	525123	592266	10046	9594	9227	8308	8510	8377	8243	8131	12.2137
Hailin	2.3954	2.5631	2.7476	3.0403	3.3623	3.7163	4.1054	4.5327	6.5941	5.677	5.1106	5.2265	3.1499	3.8219	4.2459	4.5844	445629	460268	201850	281267	286195	307360	325954	350247	36232	36231	36231	36231	36231	36231	36231	36232	1648900	1705967	1710550	1645429	857401	835048	898338	949148	109936	110296	114784	112977	113010	114375	114332	114380	2.51809
Ningan	2.3732	2.537	2.7171	2.9974	3.3051	3.643	4.0137	4.4202	6.2414	4.8215	4.854	4.655	2.7622	3.5582	3.9018	4.1621	561669	598069	557148	489664	558908	616081	664267	699253	104125	102595	101088	99604	98142	96702	95284	97860	1419832	1468783	1497557	1454868	573034	549865	577046	610428	129347	130026	129028	98628	98510	101226	102323	102885	2.18616
Muling	2.3738	2.5324	2.7097	2.924	3.1477	3.3807	3.6227	3.8736	8.5906	6.5401	6.45	6.3257	4.4164	6.4822	6.8512	7.5365	305714	301160	213129	215590	252863	304464	326832	369268	50451	49153	47935	46790	45713	44700	43745	42855	1515183	1578698	1615459	1542147	936910	1007400	1002896	1072356	129075	129262	127931	99760	100867	101056	101229	101345	1.92626
Dongning	2.7397	2.915	3.1132	3.3847	3.6753	3.9859	4.3177	4.6716	12.5697	8.4224	7.671	7.5001	3.5301	3.6944	3.8764	4.2252	367429	389239	268124	245005	246370	258885	286790	312152	32213	31604	31104	30694	30356	30077	29846	29661	1233335	1294511	1253801	1228013	468186	464644	463026	497028	58408	58408	59115	54275	53980	51928	53523	51653	3.83402
Huanan	2.0437	2.2052	2.3573	2.521	2.692	2.8703	3.056	3.2492	3.2224	2.9252	3.2449	3.4816	2.6509	4.1476	4.4765	5.0211	494954	517826	578482	617359	652663	702194	675312	710601	132259	132259	63500	63500	63500	132259	132259	132269	662564	717935	775891	816515	433194	524416	590991	686241	41722	41744	13599	13589	13580	42476	42493	42490	1.20029
Huachuan	1.832	1.9529	2.0818	2.2394	2.4031	2.5729	2.7484	2.9296	3.851	2.3935	3.0479	3.326	3.0057	4.6483	4.8081	5.0648	245548	237943	368634	388815	412065	458994	451810	470897	63500	63500	132259	132259	132259	63500	63500	63500	290742	311838	324760	344366	226038	232353	241183	249298	13265	13297	41848	42208	42568	13628	13669	13658	1.50143
Tangyuan	1.9057	2.0372	2.1738	2.3525	2.5413	2.7403	2.9497	3.1698	4.5412	3.48	3.3517	3.5708	2.7087	3.9165	4.0561	4.4396	354132	397502	322447	338616	358577	389778	380131	428736	59446	59269	59431	59282	59419	59294	59409	59282	440201	465894	500384	527298	293807	307087	314888	318500	32775	33116	32827	33107	33970	33946	33961	33779	1.89858
Fuyuan	2.0928	2.233	2.378	2.5363	2.7012	2.8726	3.0506	3.2351	6.2881	4.2886	5.644	5.9522	6.0927	8.4025	8.0916	8.3195	350368	341300	500834	534965	557441	609865	583637	577377	44493	44493	44493	44493	44493	44493	44493	44493	154840	165500	168851	173350	200963	209605	197726	218136	37794	37085	37633	38181	37793	36947	36630	36505	3.49043
Tongjiang	1.9978	2.1556	2.3254	2.5659	2.8307	3.1221	3.4429	3.7958	7.7604	5.3896	4.9025	5.2302	4.9859	6.2959	6.3348	6.6127	757289	799758	666022	714891	636632	705401	676756	697869	35980	35980	35980	35980	35980	35980	35980	35980	315672	340533	367587	383335	403736	404011	430306	449499	24065	23984	25329	25654	28456	29390	30346	31327	3.18404
Fujin	2.1508	2.3136	2.4941	2.7353	2.9981	3.2845	3.5963	3.9357	6.2296	4.346	4.1934	4.1465	3.1014	3.7415	4.0741	4.482	1116941	1038983	856372	741026	646942	753303	710063	735255	139072	139071	139071	139071	139071	139071	139071	139240	903373	961837	1062799	1141646	757718	798984	960451	1086257	54051	53552	52955	44147	46630	46128	45873	45712	2.51078
Zhaozhou	2.1601	2.3286	2.4802	2.5779	2.6263	2.65	2.6614	2.667	6.3104	4.5913	2.9982	2.6846	3.0669	4.4329	5.0426	5.7231	440959	448694	428281	450660	504908	556657	560192	573501	129849	129853	118250	118195	118164	129854	129854	129858	1705267	1569931	877243	705315	810088	817324	974024	1142093	22804	21661	15275	18750	20300	17427	17136	16882	1.33329
Zhaoyuan	2.0989	2.2311	2.379	2.521	2.6565	2.7851	2.9066	3.0208	4.673	3.4324	2.3886	2.3043	2.3596	3.3906	3.9542	4.4213	401973	417690	421635	424481	479495	537253	553866	567141	118511	118345	129854	129854	129854	118147	118136	118097	1257613	1133589	645578	590454	554390	596024	744886	862310	15533	15266	21856	18203	17789	20581	20619	20624	1.37605
Lindian	1.4148	1.5267	1.6458	1.7553	1.862	1.9652	2.0647	2.1602	2.5829	2.1318	1.7996	1.8029	2.4639	3.675	4.4829	5.3719	179789	188931	245799	235041	269099	321237	346984	354717	80118	79779	80072	79819	80038	79848	80012	79897	341388	363940	214081	219272	349248	390401	505564	655628	10057	9771	44349	25500	25810	22584	21742	21329	1.71395
Durbert Mongolian Autonomous County	1.9646	2.1159	2.2599	2.4027	2.5418	2.6767	2.8069	2.9321	8.9719	4.3346	4.4503	3.315	4.2741	5.2262	5.7077	6.2354	330058	373330	333238	349809	416014	456674	460456	474004	75519	75525	75526	75526	75526	75526	75526	75525	701687	675658	731834	432119	585224	599491	671799	749668	11049	11386	42084	46169	46506	51123	56241	61956	1.75753
Jidong	2.1296	2.2723	2.4268	2.6171	2.8207	3.0383	3.2708	3.5191	6.1342	3.1678	2.9722	3.1202	3.1801	4.0242	4.4093	4.9607	338541	334964	277185	302439	317995	333159	315015	372932	76809	76922	76855	76894	76871	76885	76877	76879	561778	582709	568696	547000	537558	535545	606917	649543	13992	14101	14204	16431	17042	17469	17843	18185	2.44474
Hulin	2.1521	2.3067	2.4705	2.7071	2.9662	3.2498	3.5605	3.9005	7.8741	4.6779	5.0614	5.453	5.6274	5.9094	6.0595	6.4143	816416	798392	870453	931573	1004666	1053400	995379	1039181	43090	42890	43010	42938	42982	42955	42971	42961	500817	520286	544122	576666	538528	546344	612505	643032	17480	12422	12094	12077	14534	14247	14133	14086	7.91847
Mishan	2.1932	2.3626	2.528	2.7375	2.9607	3.1985	3.4513	3.7199	4.9623	3.1676	3.2354	3.4479	3.502	4.1037	4.2931	4.5831	573808	564745	559164	583359	647989	679810	649245	718399	78372	78359	78363	78362	78362	78362	78362	78382	729993	734880	750290	791054	727071	729650	790380	799288	77399	82227	80535	68105	54875	49123	47627	47190	3.91215
Jixian	2.2841	2.4601	2.6421	2.8435	3.0544	3.2746	3.5043	3.7433	7.2519	2.2167	2.4723	2.7009	2.3549	2.9418	3.1329	3.1329	184562	182041	213037	244066	295695	319259	306194	325190	73639	73655	73640	73653	73642	73652	73643	73616	464820	490862	522762	552685	395507	406710	449739	480593	56928	66055	66478	66175	69189	71243	73492	75739	2.51908
Youyi	1.9581	2.0751	2.2121	2.3504	2.4936	2.6417	2.7945	2.952	5.9257	3.5734	4.0229	4.4452	3.5619	4.1177	4.3048	4.3048	153029	158508	187458	223579	175296	193372	184163	181262	87864	87770	87447	87835	87146	87138	86689	67028	228002	236705	247756	256508	223500	233127	245417	265210	5482	5088	5170	5205	5420	5514	5603	5689	13.3261
Baoqing	2.2961	2.4614	2.6485	2.9147	3.2057	3.5238	3.8712	4.2504	8.2874	3.5006	3.766	4.2866	2.9531	3.8416	3.9502	3.9502	846608	771685	818979	967531	768213	847243	801615	866399	66968	67060	67010	67037	67023	67031	67026	67028	628077	679346	713797	755693	416024	439582	490686	545273	36724	31972	32144	33026	16623	16763	16757	16761	2.3872
Raohe	2.011	2.1558	2.3175	2.4784	2.6068	2.7079	2.7866	2.8473	4.6281	3.4244	3.7642	4.3409	4.5822	5.2136	5.3356	5.3356	356417	333711	357320	412057	433348	482260	461086	466009	22370	22352	22358	22356	22356	22356	22356	22356	141457	151444	169669	191338	200209	204921	227276	247363	9058	8916	8916	8924	8937	8928	8926	8916	5.37927
Jiayin	1.9658	2.0788	2.2035	2.3246	2.4427	2.5574	2.6684	2.7755	4.8275	3.3241	2.9151	3.4058	3.5035	4.3653	4.7963	5.3453	162743	134241	95606	128432	133068	140588	155432	170014	20209	20256	20273	20279	20282	20283	20283	20283	104606	106392	112663	112226	112663	108838	111915	123711	7641	6283	5682	5824	5811	5540	5546	5534	3.1136
Tieli	1.7801	1.9242	2.0801	2.3349	2.6206	2.9411	3.3006	3.7036	2.5329	2.0126	2.0464	2.3272	2.7853	3.3837	3.5833	4.2183	371026	364692	344941	407877	379005	416546	369681	395160	31733	31735	31734	31735	31734	31734	31734	31734	369003	365796	377833	402241	422581	357460	426458	526546	10014	9807	9840	9629	12238	11370	11732	11535	2.68796
Boli	1.6916	1.8115	1.9455	2.083	2.2266	2.3764	2.5323	2.6944	3.08	1.6353	1.8354	2.01655	1.9083	2.47	2.0239	3.5013	168670	163587	144227	152728	159749	174085	183788	230971	68252	68350	68319	68329	68326	68327	68327	68327	357046	363854	386212	417955	379109	315593	377326	443520	23116	23154	23808	24215	24229	24360	24435	24482	1.96706
Luobei	2.1516	2.3062	2.4722	2.6581	2.8555	3.065	3.2871	3.5224	6.3332	3.7564	4.0101	4.0204	4.4957	4.9479	5.2149	5.8118	458714	440201	466458	434775	463154	495457	472916	500718	23501	23501	23501	23501	23501	23501	23501	23501	372776	385551	403326	429310	494711	523801	587771	667463	27859	27005	20298	20766	15924	15755	15151	14785	7.64252
Suibin	1.9007	2.049	2.2109	2.3689	2.5201	2.6637	2.7993	2.9267	4.9041	2.7673	3.0276	2.9921	3.3059	4.2061	4.2789	4.51	348702	356128	377274	357008	363628	389300	369707	378258	45980	45971	45968	45966	45965	45965	45965	45964	152083	149264	166777	170836	217289	210407	220223	235102	23976	24248	23613	23718	26554	25112	26300	24959	3.56769
Nenjiang	2.1617	2.3044	2.4588	2.6255	2.7958	2.9693	3.1457	3.3246	4.0352	4.0066	4.1369	4.4859	4.8457	6.5881	7.0463	7.3745	950320	964607	950831	1016839	183302	1251543	1272496	1281945	82928	82712	82819	82766	82792	82779	82786	82784	920756	976661	1002617	1076912	199078	1153059	1198294	1276650	74781	74619	78095	81826	87935	92239	97691	103507	2.32627
Sunke	2.0785	2.2119	2.3667	2.5234	2.6763	2.8248	2.9683	3.1064	2.5452	2.6316	2.7841	3.1909	4.0162	4.7735	5.1317	5.7229	156711	153837	158308	167609	1128612	206357	208374	229245	32416	32416	32416	32416	32416	32416	32416	32416	99545	105117	111196	138181	1114561	190722	210118	233480	7811	5400	5617	15941	8020	7741	7739	7739	3.64495
Sunwu	1.6692	1.807	1.9443	2.1404	2.3537	2.5855	2.837	3.1096	1.6529	1.5237	1.5761	1.812	2.6696	2.9935	3.2146	3.4157	75140	73822	70880	80477	83251	93856	99612	101438	24468	24468	24468	24468	24468	24468	24468	24468	72130	77008	82478	87932	135639	129493	133767	144134	15771	15771	15445	15407	15357	15422	15357	15352	2.32251
Beian	2.2132	2.4095	2.5878	2.7894	3.0013	3.2236	3.4564	3.6998	3.0674	2.5736	2.6848	2.7582	2.8781	4.005	4.2863	4.501	355532	360831	344028	321359	317210	376605	387038	386175	53897	53627	53477	53393	53347	53321	53307	53298	719661	777169	806944	844121	887577	879473	914698	965023	117827	118880	127800	128000	127451	128759	129992	131295	2.57361
Wudalianchi	2.0583	2.223	2.3742	2.535	2.7009	2.8717	3.0472	3.2271	2.6477	2.9917	2.5455	3.2653	3.3156	4.5884	4.823	4.8962	525280	514698	500966	525560	598815	662044	683999	645856	60805	60805	60805	60805	60805	60805	60805	60804	277242	295520	309534	336494	438974	418497	420689	464430	66624	65860	46704	38488	41812	42423	42873	43243	2.17268
Wangkui	1.5734	1.6978	1.8234	1.9468	2.0673	2.1843	2.2974	2.4062	2.2544	1.7154	1.7244	1.7146	1.649	2.6517	2.7457	2.9151	390350	411912	383773	345370	377627	415064	413490	417922	140158	140158	140158	140158	140158	140158	140158	140158	345035	372862	395507	418592	354291	360443	359434	391027	39533	39445	41341	36896	34563	33302	33392	33368	1.26068
Lanxi	1.4075	1.5046	1.6114	1.727	1.8451	1.9655	2.0877	2.2116	1.523	1.3032	1.4874	1.5587	1.4787	2.3855	2.5046	2.7081	284449	286535	332399	340478	382978	417467	427808	448276	126315	126046	126190	126113	126154	126132	126144	126133	308372	358565	389719	416652	332362	325878	333603	365508	90531	90436	89976	85675	90354	86879	89120	87339	1.06549
Qinggang	1.459	1.562	1.6698	1.7892	1.9095	2.0304	2.1514	2.2721	1.0996	1.228	1.482	1.67	1.7184	2.743	2.9608	3.1923	290266	325336	384940	393763	429466	467374	475209	492368	129366	126596	129356	126606	129346	126616	129336	126624	288586	306462	327606	351228	334171	338677	362687	401467	56541	56821	56954	58863	59770	60015	60083	60102	0.985576
Qingan	2.048	2.1894	2.347	2.511	2.6798	2.8531	3.0305	3.2119	1.2909	2.3641	2.4559	2.631	2.3289	3.3142	3.5645	3.7997	360079	367184	412689	439044	484313	516072	540567	556740	131250	131248	131248	131248	131248	131248	131248	131248	450567	514615	498433	526654	364789	358311	370165	400783	71465	66871	67215	67365	66986	65902	66098	66064	1.7601
Mingshui	1.417	1.5063	1.6057	1.7069	1.8021	1.8911	1.9737	2.0501	1.9252	1.8313	1.6805	1.7798	1.5137	2.6294	2.7929	2.9439	308529	306264	246269	259509	289252	315942	319861	328728	131167	131163	131161	131160	131160	131160	131160	131159	301076	319112	319729	334144	213443	215607	223354	236496	49830	50642	50059	51228	53709	55065	56312	57471	0.820894
Suiling	1.4268	1.5423	1.6487	1.75	1.8455	1.935	2.0185	2.0959	2.2766	2.5176	2.0907	2.1549	1.7378	2.4292	2.6445	2.9334	404531	437398	264329	269374	296189	312638	330850	367437	55579	57322	55592	57309	55604	57296	55617	57286	315150	343077	360377	365460	212304	212086	219207	233919	42294	45568	46482	47591	50377	53700	56675	59427	1.87059
Anda	2.3095	2.4826	2.6514	2.9367	3.2506	3.5959	3.9752	4.3919	14.914	7.023	6.4742	5.8129	4.0341	5.0448	5.1267	5.4208	593675	524040	389740	356066	388833	424831	422342	401041	112986	113564	114142	114719	115295	115870	116445	111399	2688036	2773258	2598972	2279513	1421466	1392307	1377127	1474541	24486	24602	26674	26807	19765	19882	19917	19928	2.00052
Zhaodong	2.3229	2.4949	2.6621	2.94	3.2466	3.585	3.9585	4.3705	7.9855	4.5129	4.589	4.2192	2.4437	3.2762	3.3839	3.5254	836655	834611	836187	822083	896261	1025034	1024761	1052158	235477	235325	235241	235195	235169	235154	235146	235244	3113185	3195379	3163156	2811277	1196883	1173504	1196749	1239362	43703	41312	36493	33429	37496	38322	39495	38536	1.66224
Hailun	1.785	1.9279	2.0686	2.2179	2.3684	2.5197	2.6712	2.8223	1.6944	1.6197	1.8773	1.9524	1.5905	2.5599	2.7783	2.9483	631767	612637	804951	815542	761620	817070	858492	893339	259647	259366	259271	259238	259227	259223	259222	259218	607895	647509	636405	666268	438716	435682	451491	479083	100160	101212	102042	98601	99151	98866	98999	98942	1.13939
Huma	1.0799	2.2239	2.3685	1.5207	2.6788	2.8428	3.0126	3.1882	4.1609	3.4291	2.8414	2.9208	3.7426	4.6517	4.8573	5.4661	96758	103999	71611	70704	77566	82150	85161	90204	8446	8342	8422	8360	8408	8371	8399	8377	54414	59216	58418	60611	88838	88604	87750	101750	3985	3610	3409	3087	3897	4136	4234	4270	1.15866
Tahe	1.9666	1.1141	1.2684	1.433	2.6023	2.776	2.9538	3.1354	3.8183	2.661	2.3165	2.5212	2.9254	4.0593	4.592	5.1375	92235	130650	94066	97508	109126	95195	119365	93131	3807	3807	3807	3807	3807	4354	3807	3807	56456	63171	54935	57591	102166	125325	110707	148275	4169	6702	6322	6281	6170	5034	6122	6206	1.19938
Mohe	1.1804	1.3509	1.5178	1.7391	2.9769	3.2323	3.5062	3.7998	8.5188	4.0639	3.791	4.1075	4.7024	6.283	7.9327	9.2113	81550	74421	97839	100928	110027	90748	114319	97928	3891	1691	1691	1691	1691	4083	1691	1691	124345	155970	143062	152963	218845	337314	298532	350312	3677	9682	9555	9485	9448	4070	8907	8686	1.47361
[truncated: 131 more columns]

## Sheet: County-level calculation data
	Level of county economic development								Per capita output efficiency of secondary and tertiary industries								Urban-rural income ratio								Per capita savings level of residents								Industrial employment absorption capacity								Education service provision								Medical and health conditions 医疗卫生条件
	2015	2016	2017	2018	2019	2020	2021	2022	2015	2016	2017	2018	2019	2020	2021	2022	2015	2016	2017	2018	2019	2020	2021	2022	2015	2016	2017	2018	2019	2020	2021	2022	2015	2016	2017	2018	2019	2020	2021	2022	2015	2016	2017	2018	2019	2020	2021	2022	2015
Yilan	2.1274	2.2249	2.3695	2.5029	2.6366	2.7702	2.9035	3.0361	6.69225	7.21006	7.80623	7.39047	6.46047	4.22349	3.90691	3.76354	0.161	0.15072	0.0837558	0.0991271	0.154221	0.184	0.18745	0.205	1.67944	1.93874	1.8995	2.33006	2.67708	4.42151	3.75095	3.38496	0.295652	0.316279	0.316969	0.325703	0.330595	0.34357	0.346387	0.35816	0.136365	0.139166	0.153983	0.164119	0.179243	0.190911	0.168102	0.248681	28.488
Fangzheng	1.9124	2.0418	2.1888	2.4656	2.7773	3.1283	3.5233	3.9681	6.6924	6.71625	5.76341	5.80113	5.27027	4.4833	4.27063	4.015	0.193	0.196059	0.232476	0.250116	0.313603	0.313	0.330178	0.364	2.52848	2.90519	3.3504	3.74053	4.49278	6.61976	5.94831	6.18462	0.291227	0.296251	0.308792	0.30793	0.309531	0.306085	0.30696	0.306462	0.187493	0.199769	0.203754	0.210129	0.219161	0.229296	0.241651	0.359739	43.51
Binxian	2.1692	2.3126	2.4699	2.6353	2.8057	2.9809	3.1606	3.3445	3.20728	3.33986	3.25727	3.17647	2.78483	2.14082	2.1091	2.06317	0.209	0.193972	0.157662	0.15244	0.319494	0.365	0.357126	0.375	1.53137	1.74952	1.87213	2.24421	2.53307	4.292	3.95844	3.84838	0.501254	0.503938	0.518097	0.52399	0.524692	0.523433	0.524081	0.524703	0.0683539	0.0678651	0.0700848	0.073023	0.076861	0.0825285	0.0885278	0.131042	30.826
Bayan	2.0079	2.0673	2.1913	2.4372	2.7106	3.0146	3.3525	3.7281	2.61896	2.46243	2.28606	2.62865	2.51428	1.68691	1.6496	1.62089	0.566	0.468953	0.462253	0.289554	0.526595	0.556	0.532747	0.522	1.30055	1.48064	1.68171	1.75835	2.10804	4.04328	3.13527	2.67229	0.553634	0.527472	0.550139	0.535789	0.493115	0.482111	0.482075	0.48317	0.0778271	0.0785142	0.0826773	0.0864495	0.0925211	0.0991352	0.106203	0.157739	24.884
Mulan	1.8122	1.9308	2.0679	2.3226	2.6086	2.9299	3.2907	3.6958	4.41371	4.53669	4.92829	4.93679	5.39054	3.75774	3.5643	3.41904	0.196	0.211153	0.172992	0.151685	0.162526	0.179	0.181055	0.185	1.37262	1.55528	1.68115	1.91912	2.18772	3.7232	3.26608	3.21367	0.299414	0.309389	0.299889	0.305963	0.273257	0.276677	0.277327	0.275773	0.176549	0.176303	0.184265	0.192529	0.209284	0.223437	0.237441	0.358347	26.687
Tonghe	1.882	2.0079	2.1565	2.3694	2.5973	2.8406	3.0999	3.3756	4.61723	4.61611	3.58789	4.18141	4.07569	2.92987	2.66518	2.56254	0.37	0.391336	0.726493	0.441164	0.476114	0.548	0.592412	0.637	1.71548	1.9959	2.11955	2.45551	2.96623	4.56174	4.09693	4.044	0.438775	0.448479	0.455142	0.467565	0.456012	0.466841	0.478459	0.49043	0.1214	0.167889	0.199819	0.251757	0.268076	0.26861	0.257718	0.374467	36.59
Yanshou	1.8245	1.9542	2.089	2.3394	2.6196	2.9332	3.2842	3.6771	3.74517	5.62695	5.80005	5.59548	5.19442	3.82144	3.67972	3.55449	0.293	0.191005	0.144211	0.138171	0.180365	0.19	0.18876	0.197	1.57291	1.85134	1.92302	2.11232	2.43611	4.28873	3.73583	3.55505	0.376798	0.306743	0.317054	0.326777	0.327477	0.331027	0.332697	0.334047	0.192773	0.188252	0.230569	0.252301	0.220868	0.230068	0.24038	0.35145	31.225
Shangzhi	2.1778	2.3366	2.5002	2.6997	2.912	3.1377	3.3775	3.6318	1.58474	2.11603	2.4392	2.42364	2.14498	1.73653	1.64476	1.5579	0.676	0.737192	0.569253	0.569787	0.83263	0.934	0.985296	1.046	2.23621	2.60861	2.83489	3.142	3.60437	4.98655	4.88007	4.96754	0.647879	0.650715	0.622724	0.619347	0.619045	0.618711	0.618425	0.618198	0.100207	0.116308	0.119249	0.115717	0.121251	0.127912	0.104493	0.111105	35.656
Wuchang	2.0546	2.2127	2.3742	2.6061	2.8587	3.1336	3.4325	3.7573	2.78336	2.92583	2.92931	2.96967	2.39839	1.88624	1.83465	1.761	0.311	0.306565	0.256366	0.268753	0.522524	0.583	0.583047	0.613	1.65422	1.87056	2.05581	2.21532	2.69287	3.90577	3.66318	3.67713	0.471992	0.471961	0.471515	0.470738	0.475312	0.473729	0.47473	0.474301	0.103412	0.108031	0.107608	0.114445	0.114511	0.127595	0.134446	0.155899	31.679
Longjiang	1.6147	1.7421	1.8728	1.95	2.0268	2.103	2.1784	2.253	2.00525	2.45528	1.48845	2.22218	2.28446	1.59696	1.64298	1.52105	0.612	0.51427	0.673958	0.634922	0.601876	0.655	0.574693	0.664	0.968728	1.19441	1.35703	1.48552	1.91919	3.23313	2.62914	2.42802	0.442851	0.442329	0.4435	0.4391	0.436947	0.435586	0.436685	0.435967	0.068331	0.0690247	0.0729962	0.0776862	0.0825574	0.0892158	0.0934407	0.0754954	29.983
Yian	1.8472	1.9743	2.1066	2.2783	2.4624	2.6598	2.8712	3.0976	3.65237	4.11688	3.67051	3.25507	3.29695	2.23284	2.2685	2.17369	0.329	0.277716	0.341676	0.410242	0.38975	0.474	0.439642	0.47	1.11464	1.26669	1.41875	1.50402	1.84705	2.93008	2.56941	2.47878	0.308661	0.287068	0.288984	0.295354	0.298436	0.313166	0.310473	0.31147	0.127786	0.127165	0.132532	0.139015	0.147573	0.158369	0.167696	0.136546	19.91
Tailai	1.544	1.6535	1.7676	1.8843	2.003	2.1234	2.2451	2.368	2.44607	2.8304	2.85234	2.78935	2.82872	2.15168	2.21177	2.13538	0.562	0.54459	0.51747	0.517624	0.4814	0.584	0.519983	0.552	1.21113	1.42916	1.60349	1.86784	2.31361	3.40498	3.16954	3.35824	0.400082	0.402018	0.403204	0.405789	0.410103	0.410411	0.412155	0.412849	0.138026	0.135041	0.138676	0.145406	0.149853	0.159918	0.166556	0.134193	27.366
Gannan	1.4959	1.6203	1.7499	1.9545	2.1829	2.438	2.7228	3.0407	5.63785	4.32634	5.75238	4.70285	4.14073	3.25641	3.20125	3.13295	0.284	0.30759	0.242278	0.292498	0.31789	0.33	0.319959	0.325	1.70709	1.79533	1.97996	2.11214	2.63094	3.93624	3.88597	3.81007	0.22378	0.262649	0.210818	0.234435	0.26355	0.254259	0.255069	0.254918	0.129578	0.105046	0.107598	0.118278	0.109326	0.117618	0.125134	0.100556	23.207
Fuyu	1.9794	2.1418	2.2939	2.4771	2.6718	2.8785	3.0975	3.3294	1.46742	2.04875	2.194	4.59761	4.24945	3.22689	3.40772	3.37487	0.835	0.699564	0.602119	0.265982	0.346133	0.378	0.333389	0.318	1.69451	1.84489	2.12226	2.45346	2.70789	4.16686	3.84133	3.81744	0.478301	0.470266	0.481816	0.296134	0.298935	0.290228	0.299275	0.290636	0.152715	0.151793	0.167273	0.17485	0.184872	0.201479	0.217175	0.180312	54.765
Keshan	1.8514	1.9754	2.1058	2.3565	2.6369	2.9504	3.3009	3.6928	1.7159	1.91117	2.4951	2.46703	1.92453	0.838188	0.833725	0.816437	0.989	1.00698	0.994058	0.979759	1.70926	1.669	1.55995	1.587	1.22247	1.35061	1.55485	1.77428	2.01312	4.24114	2.97496	2.48485	0.586477	0.594778	0.625594	0.625306	0.624375	0.621181	0.627235	0.62864	0.134211	0.137206	0.198452	0.213565	0.233442	0.181022	0.188351	0.162891	33.257
Kedong	1.4129	1.5237	1.6349	1.7562	1.8834	2.0166	2.1558	2.3011	2.05718	1.67885	1.27981	1.286	1.24984	1.03528	1.12677	1.08532	0.831	0.786189	0.710376	0.66932	0.712929	0.677	0.498804	0.525	1.39471	1.45871	1.58006	1.67875	1.93572	4.07472	2.83578	2.3	0.600073	0.619356	0.601122	0.607173	0.614594	0.604633	0.590812	0.581115	0.180957	0.18704	0.146397	0.15918	0.179469	0.256393	0.278869	0.231483	35.58
Baiquan	1.5181	1.6409	1.759	1.8873	2.0226	2.1652	2.3152	2.473	6.39017	7.32219	7.5124	6.70105	5.89364	2.84815	2.87198	2.77125	0.126	0.120727	0.104188	0.117931	0.197247	0.236	0.212637	0.22	0.877498	0.991616	1.17274	1.34122	1.60241	3.76004	2.35617	1.83326	0.181113	0.191281	0.191996	0.205732	0.185836	0.186584	0.184338	0.182446	0.132992	0.132617	0.116745	0.123024	0.131626	0.140613	0.141301	0.117239	20.989
Nehe	2.0546	2.218	2.3777	2.5798	2.7938	3.02	3.2588	3.5103	4.58987	4.57584	4.2424	3.67888	3.46048	2.01077	1.97114	1.95548	0.297	0.259232	0.312837	0.378654	0.437118	0.566	0.556461	0.55	1.27482	1.40467	1.66565	1.76494	2.05764	3.79346	2.87003	2.53139	0.366302	0.355796	0.349568	0.372284	0.370616	0.36865	0.36873	0.368285	0.0731492	0.0756955	0.0755735	0.0676169	0.070412	0.0739046	0.0791889	0.0800602	21.595
Linkou	2.1001	2.2365	2.3841	2.5237	2.6543	2.7757	2.888	2.9913	1.37281	1.76876	2.01034	2.14247	1.71305	1.17984	1.1197	1.10555	0.859	0.807247	0.678171	0.522088	0.912164	1.042	1.06798	1.068	1.74685	1.7973	1.93374	2.3579	2.83823	4.51027	3.81892	3.57168	0.584605	0.588378	0.564043	0.569438	0.577242	0.583219	0.588362	0.589959	0.152762	0.153457	0.161547	0.165402	0.176602	0.18648	0.194167	0.107979	29.435
Suifenhe	3.0604	3.2685	3.4973	3.83	4.1942	4.5927	5.0288	5.506	12.5696	10.5079	10.9689	12.192	7.94178	13.4687	13.3804	13.2981	0.059	0.0603597	0.0758507	0.0629916	0.171282	0.174	0.172323	0.17	12.2137	13.3655	13.3667	13.9395	15.4449	11.1313	18.9067	51.6858	0.884565	0.87978	0.875676	0.863797	0.866599	0.864767	0.86287	0.861335	0.0660433	0.0668443	0.0676188	0.0679237	0.06966	0.0719341	0.0747889	0.0809569	79.487
Hailin	2.3954	2.5631	2.7476	3.0403	3.3623	3.7163	4.1054	4.5327	2.27457	2.72453	2.91597	2.78662	2.40863	1.9103	1.85056	1.81085	0.82	0.821334	0.373847	0.533027	1.04115	1.162	1.145	1.165	2.51809	2.74476	3.375	3.58897	4.16896	5.91846	5.45457	5.31525	0.752121	0.752735	0.760083	0.757178	0.757232	0.759432	0.759363	0.759435	0.130365	0.0825675	0.0837311	0.0901973	0.0677192	0.0698609	0.0728541	0.0774967	41.085
Ningan	2.3732	2.537	2.7171	2.9974	3.3051	3.643	4.0137	4.4202	1.75873	2.34285	2.39111	3.16886	2.10593	1.52663	1.44535	1.43334	0.491	0.516057	0.474867	0.333271	0.979006	1.173	1.23619	1.204	2.18616	2.58685	2.92034	3.11657	3.53735	5.35356	4.80593	4.62021	0.554015	0.558961	0.560709	0.497538	0.500936	0.511428	0.517811	0.512516	0.135765	0.107993	0.122382	0.0899567	0.0981038	0.0974457	0.110325	0.114606	35.64
Muling	2.3738	2.5324	2.7097	2.924	3.1477	3.3807	3.6227	3.8736	1.36647	1.86743	1.95776	2.44377	2.1032	1.53786	1.44605	1.40561	0.516	0.501671	0.352103	0.298062	0.595521	0.683	0.754128	0.814	1.92626	2.22006	2.3536	2.56481	3.59157	5.64449	4.91527	4.59327	0.718977	0.724502	0.727435	0.680723	0.688136	0.693323	0.698256	0.702809	0.131173	0.125735	0.129508	0.123755	0.128022	0.134031	0.142681	0.152982	29.16
Dongning	2.7397	2.915	3.1132	3.3847	3.6753	3.9859	4.3177	4.6716	1.6799	2.63146	2.7649	3.01673	2.45696	2.422	2.2317	2.19783	0.54	0.555701	0.406433	0.352792	0.935745	0.962	1.11074	1.094	3.83402	4.04838	4.44916	5.70392	6.49023	7.50927	8.29318	9.61017	0.644531	0.648891	0.655239	0.638762	0.640059	0.63323	0.642001	0.635229	0.205639	0.190502	0.199033	0.192672	0.202574	0.207551	0.212399	0.115266	37.405
Huanan	2.0437	2.2052	2.3573	2.521	2.692	2.8703	3.056	3.2492	4.92814	5.87943	17.583	17.2583	12.0334	2.9767	3.10688	3.21633	0.236	0.22765	0.15967	0.161803	0.322205	0.43	0.367127	0.333	1.20029	1.8649	2.16051	2.26548	2.57195	4.27815	3.67206	3.35594	0.239808	0.239904	0.176384	0.176277	0.176181	0.243088	0.243162	0.243135	0.0588385	0.0808416	0.220801	0.23737	0.252773	0.14215	0.151969	0.0898274	31.228
Huachuan	1.832	1.9529	2.0818	2.2394	2.4031	2.5729	2.7484	2.9296	5.6915	9.7981	2.54617	2.45303	1.76666	3.66794	3.66975	3.60097	0.176	0.159781	0.359155	0.360323	0.586735	0.424	0.403248	0.406	1.50143	1.91111	2.118	2.31191	2.56342	4.05307	3.60931	3.34961	0.1728	0.173145	0.240358	0.241925	0.243486	0.176693	0.177131	0.177013	0.133269	0.156258	0.0850129	0.090274	0.092429	0.269129	0.289019	0.171407	21.144
Tangyuan	1.9057	2.0372	2.1738	2.3525	2.5413	2.7403	2.9497	3.1698	2.95759	4.04269	4.54786	4.46037	3.19305	2.3098	2.28595	2.11244	0.444	0.476719	0.355937	0.358631	0.697735	0.727	0.690089	0.767	1.89858	2.11205	2.40036	2.57229	2.79733	4.69082	3.88247	3.47999	0.355396	0.358456	0.355817	0.358344	0.363747	0.364071	0.363725	0.362977	0.220163	0.203424	0.23158	0.297215	0.252189	0.266591	0.282527	0.163897	31.698
Fuyuan	2.0928	2.233	2.378	2.5363	2.7012	2.8726	3.0506	3.2351	0.65154	1.0406	0.794965	0.76278	0.87276	0.675171	0.667102	0.715802	1.922	1.71888	2.50881	2.64824	2.35615	2.416	2.4301	2.172	3.49043	4.32459	4.29622	4.06283	4.57376	4.08118	6.2656	9.52303	0.459295	0.454596	0.458235	0.461826	0.459288	0.453671	0.451537	0.45069	0.665063	0.381425	0.39092	0.613324	0.418828	0.391504	0.421645	0.247004	22.488
Tongjiang	1.9978	2.1556	2.3254	2.5659	2.8307	3.1221	3.4429	3.7958	1.69031	2.6344	2.96022	2.85697	2.84564	2.18341	2.23843	2.24	1.605	1.56552	1.27551	1.3297	1.24711	1.426	1.32646	1.352	3.18404	2.07972	2.30328	2.2926	2.69537	3.24712	4.04933	4.8841	0.400783	0.399973	0.413137	0.416231	0.441616	0.449595	0.457528	0.465435	0.115556	0.0832939	0.0853254	0.123106	0.0704033	0.0739279	0.0779368	0.0815303	23.042
Fujin	2.1508	2.3136	2.4941	2.7353	2.9981	3.2845	3.5963	3.9357	2.68289	4.13272	4.78606	6.23661	5.23943	4.62943	5.13909	5.28328	0.481	0.415955	0.306819	0.206047	0.286277	0.313	0.243861	0.222	2.51078	2.31942	2.60125	2.64877	2.72126	7.67038	8.48606	4.12245	0.279879	0.278015	0.27577	0.240953	0.251103	0.249073	0.248037	0.247156	0.0815746	0.0703642	0.0718034	0.0873458	0.0593518	0.0729459	0.0762951	0.0699562	22.278
Zhaozhou	2.1601	2.3286	2.4802	2.5779	2.6263	2.65	2.6614	2.667	11.8502	15.7858	19.1548	14.0121	13.0118	10.58	11.2721	11.6456	0.045	0.0476756	0.0630651	0.10136	0.107076	0.091	0.0758964	0.065	1.33329	1.47837	1.70838	1.82496	2.26684	3.92178	3.32247	3.02472	0.149385	0.142964	0.114398	0.136916	0.146609	0.118325	0.116579	0.115047	0.100325	0.100535	0.0952266	0.12312	0.104834	0.153802	0.163376	0.10441	24.119
Zhaoyuan	2.0989	2.2311	2.379	2.521	2.6565	2.7851	2.9066	3.0208	17.3259	21.6338	12.3662	14.0768	13.2076	8.54124	9.13616	9.45901	0.042	0.0475307	0.109927	0.100777	0.118485	0.157	0.129778	0.115	1.37605	1.5674	1.81265	2.05546	2.49135	4.05428	3.53747	3.29921	0.11588	0.114257	0.144064	0.122946	0.120487	0.148355	0.1486	0.148673	0.0933668	0.0920072	0.104346	0.10875	0.142956	0.110358	0.115026	0.0945239	22.168
Lindian	1.4148	1.5267	1.6458	1.7553	1.862	1.9652	2.0647	2.1602	13.1423	17.4721	2.68237	4.76948	5.4919	4.70384	5.18702	5.61345	0.066	0.0635805	0.635924	0.342448	0.248468	0.233	0.1865	0.144	1.71395	1.8499	2.00099	2.25983	2.57467	4.27515	3.76497	3.70863	0.111528	0.109112	0.356443	0.242122	0.24384	0.220478	0.213672	0.210707	0.167183	0.16621	0.177012	0.185462	0.193198	0.201479	0.212665	0.175472	25.588
Durbert Mongolian Autonomous County	1.9646	2.1159	2.2599	2.4027	2.5418	2.6767	2.8069	2.9321	7.07842	13.6901	3.90757	2.82338	2.94421	2.24378	2.09279	2.13772	0.069	0.0833003	0.253725	0.494859	0.437722	0.516	0.510394	0.519	1.75753	1.74347	1.94942	2.22789	2.69245	4.00737	3.7504	3.85393	0.127634	0.131008	0.357827	0.379383	0.381097	0.403659	0.426822	0.450651	0.14926	0.147601	0.153769	0.160707	0.164767	0.169255	0.185032	0.14071	30.04
Jidong	2.1296	2.2723	2.4268	2.6171	2.8207	3.0383	3.2708	3.5191	6.54526	13.045	13.4707	10.6694	9.91891	7.61813	7.71422	7.33833	0.11	0.105377	0.0900799	0.118147	0.131145	0.141	0.120468	0.136	2.44474	2.44667	3.01833	3.1363	3.513	5.29607	4.80907	4.70397	0.154095	0.154917	0.155987	0.176062	0.181466	0.185143	0.188376	0.191292	0.173231	0.176573	0.186755	0.206861	0.202221	0.203662	0.211584	0.138773	46.037
Hulin	2.1521	2.3067	2.4705	2.7071	2.9662	3.2498	3.5605	3.9005	3.63862	8.95364	8.88906	8.75648	6.58439	6.48932	7.15218	7.09331	0.661	0.444436	0.449831	0.45437	0.630829	0.639	0.534488	0.53	7.91847	4.84138	5.02071	5.12179	5.81852	6.68148	7.62362	9.11278	0.288592	0.224581	0.219476	0.219522	0.252695	0.249065	0.247496	0.246919	0.092702	0.0690521	0.0721765	0.0862747	0.0638899	0.0664864	0.0697072	0.0721003	37.354
Mishan	2.1932	2.3626	2.528	2.7375	2.9607	3.1985	3.4513	3.7199	1.90064	2.82145	2.8795	3.36878	3.78343	3.61955	3.86555	3.66177	0.776	0.80642	0.76592	0.640919	0.624108	0.584	0.499253	0.541	3.91215	3.58417	3.87235	4.04171	4.57736	6.28824	6.51459	6.9873	0.496877	0.512043	0.506835	0.464985	0.41186	0.385324	0.378025	0.3758	0.086864	0.0834951	0.0829881	0.100163	0.0771545	0.0835466	0.0861231	0.0935528	48.458
Jixian	2.2841	2.4601	2.6421	2.8435	3.0544	3.2746	3.5043	3.7433	1.12592	3.35233	3.18072	3.09225	2.42742	1.94057	1.95332	2.08733	0.307	0.332593	0.367888	0.396765	0.702427	0.759	0.67943	0.696	2.51908	2.80098	3.00837	3.18636	3.62438	5.19393	4.92811	4.87441	0.436006	0.472801	0.474443	0.47326	0.484412	0.491687	0.499487	0.507107	0.135595	0.13572	0.144184	0.158344	0.163318	0.177685	0.195208	0.160892	35.422
Youyi	1.9581	2.0751	2.2121	2.3504	2.4936	2.6417	2.7945	2.952	7.01875	13.019	11.9123	11.0864	11.577	10.2677	10.1749	10.9955	0.042	0.038819	0.0447327	0.0516515	0.0487805	0.052	0.0485014	0.058	13.3261	5.39879	5.5652	6.14948	5.71118	16.8363	18.9681	22.3732	0.0587277	0.0547933	0.0558213	0.0559437	0.0585528	0.059513	0.0607095	0.0782348	0.24039	0.233579	0.254548	0.335406	0.383412	0.26011	0.27126	0.155311	35.072
Baoqing	2.2961	2.4614	2.6485	2.9147	3.2057	3.5238	3.8712	4.2504	2.06369	6.06986	5.8965	5.33797	8.47483	6.82615	7.4129	8.23756	0.739	0.541571	0.550375	0.630755	0.457982	0.482	0.408428	0.397	2.3872	2.40513	2.77329	3.00991	3.22262	4.62341	4.66754	4.72222	0.354164	0.322845	0.324183	0.330052	0.19873	0.20005	0.200005	0.200038	0.124662	0.111556	0.1171	0.126437	0.121799	0.153375	0.127857	0.102505	32.497
Raohe	2.011	2.1558	2.3175	2.4784	2.6068	2.7079	2.7866	2.8473	3.37434	4.96018	5.05545	4.93926	4.88897	4.40245	4.77214	5.19391	1.02	0.878966	0.839831	0.85965	0.865268	0.94	0.810011	0.751	5.37927	2.99456	2.88888	3.07919	3.31331	4.1329	4.60745	5.1994	0.288214	0.285148	0.285093	0.285294	0.285591	0.285386	0.28534	0.285111	0.487313	0.335435	0.350674	0.535683	0.329081	0.342941	0.361636	0.295717	33.052
Jiayin	1.9658	2.0788	2.2035	2.3246	2.4427	2.5574	2.6684	2.7755	2.83586	5.0941	6.80184	5.65787	5.53386	4.50046	4.20729	4.17308	0.588	0.391372	0.237841	0.328666	0.338402	0.353	0.379752	0.375	3.1136	3.1457	3.2747	3.51597	3.81551	5.25812	5.49424	5.56255	0.274363	0.236746	0.218917	0.223116	0.222703	0.214537	0.21472	0.214355	0.645444	0.209593	0.23636	0.227884	0.253231	0.834813	0.289358	0.590299	65.659
Tieli	1.7801	1.9242	2.0801	2.3349	2.6206	2.9411	3.3006	3.7036	14.548	18.533	18.7635	17.9503	12.3973	9.29127	10.1443	10.6396	0.317	0.308095	0.283084	0.30767	0.345876	0.418	0.320478	0.273	2.68796	3.15244	3.47357	3.65478	4.24339	5.91961	6.71713	6.34155	0.239874	0.236074	0.236686	0.232787	0.278313	0.263781	0.269912	0.266588	0.123242	0.126091	0.130805	0.136687	0.141625	0.150611	0.148438	0.163138	36.872
Boli	1.6916	1.8115	1.9455	2.083	2.2266	2.3764	2.5323	2.6944	5.01488	9.60956	8.83837	8.55926	8.1994	5.24509	7.62984	5.18408	0.16	0.152303	0.130137	0.1295	0.149425	0.197	0.174189	0.187	1.96706	2.03846	2.26302	2.45403	2.91639	5.26151	4.0896	3.55077	0.252999	0.253038	0.258426	0.261659	0.261779	0.26282	0.263416	0.263789	0.148147	0.153002	0.162862	0.163444	0.18184	0.208022	0.207899	0.172716	18.908
Luobei	2.1516	2.3062	2.4722	2.6581	2.8555	3.065	3.2871	3.5224	2.1128	3.80072	4.95505	5.1422	6.91038	6.71935	7.43911	7.58011	1.459	1.31198	0.998903	0.89487	0.634366	0.634	0.518717	0.472	7.64252	3.27131	3.67256	4.13603	7.4491	9.11048	6.30578	7.37431	0.542426	0.534689	0.463435	0.469108	0.403906	0.40134	0.391985	0.386172	0.178411	0.323208	0.350709	0.566818	0.19926	0.202423	0.282229	0.227939	18.034
Suibin	1.9007	2.049	2.2109	2.3689	2.5201	2.6637	2.7993	2.9267	1.29344	2.22445	2.33285	2.40727	2.47524	1.99205	1.95693	1.98209	1.196	1.25847	1.16203	1.0783	0.966768	1.011	0.960558	0.874	3.56769	2.56506	2.74485	2.89164	2.87933	4.41669	4.50008	4.53417	0.34273	0.34532	0.33936	0.340365	0.366166	0.353307	0.363938	0.351917	0.385826	0.34384	0.315672	0.394418	0.326967	0.334044	0.372935	0.315726	21.432
Nenjiang	2.1617	2.3044	2.4588	2.6255	2.7958	2.9693	3.1457	3.3246	3.05132	3.26677	3.10339	2.93386	0.467202	1.89748	1.7408	1.77209	0.931	0.89102	0.894255	0.933494	0.977952	1.209	1.25311	1.256	2.32627	1.75721	1.98402	2.30858	3.69499	5.40358	5.3229	5.11522	0.474171	0.47428	0.485321	0.497144	0.515062	0.527026	0.541293	0.55562	0.103345	0.106811	0.112171	0.126685	0.133307	0.144327	0.153632	0.0735153	17.427
Sunke	2.0785	2.2119	2.3667	2.5234	2.6763	2.8248	2.9683	3.1064	5.00715	7.39706	7.1105	2.71656	34.603	5.16139	5.29075	5.27168	0.379	0.243794	0.246694	0.596493	0.250528	0.258	0.236759	0.234	3.64495	2.86411	3.13778	3.55656	4.09635	5.99841	6.40613	6.63001	0.194173	0.142797	0.147688	0.329652	0.198338	0.192768	0.192728	0.192728	0.506075	0.466478	0.493929	0.569584	0.533458	0.567205	0.599201	0.372595	37.889
Sunwu	1.6692	1.807	1.9443	2.1404	2.3537	2.5855	2.837	3.1096	2.76701	3.20462	3.38818	3.14971	3.30851	2.80496	2.70967	2.74777	0.671	0.617889	0.542469	0.576294	0.385224	0.457	0.46738	0.442	2.32251	2.56984	2.79651	3.24637	3.71842	5.56339	5.56887	5.32321	0.391933	0.391933	0.386967	0.386382	0.385612	0.386613	0.385612	0.385535	0.414111	0.40037	0.414403	0.444035	0.472346	0.498013	0.52099	0.333683	25.155
Beian	2.2132	2.4095	2.5878	2.7894	3.0013	3.2236	3.4564	3.6998	1.99119	2.54019	2.3518	2.39094	2.41967	1.70546	1.64164	1.64935	1.08	1.02923	1.01886	0.912665	0.853835	1.034	1.03183	0.986	2.57361	2.91639	3.14388	3.48582	3.89162	6.21932	5.55629	5.21324	0.686142	0.689131	0.704998	0.70565	0.704936	0.707156	0.70918	0.711267	0.134274	0.125197	0.13055	0.146779	0.131315	0.14274	0.151963	0.107788	63.145
Wudalianchi	2.0583	2.223	2.3742	2.535	2.7009	2.8717	3.0472	3.2271	1.57166	1.49985	2.60364	2.6775	3.16647	2.14996	2.03451	2.21247	2.076	1.88646	1.24312	0.988624	0.938027	1.104	1.14641	1.005	2.17268	2.51044	2.69078	2.98213	3.36169	5.09702	4.48409	4.23729	0.522832	0.519954	0.434419	0.38762	0.407457	0.410964	0.413521	0.41561	0.112196	0.095049	0.096971	0.105742	0.0919725	0.0970422	0.103884	0.112007	45.556
Wangkui	1.5734	1.6978	1.8234	1.9468	2.0673	2.1843	2.2974	2.4062	3.87144	5.5105	5.54798	6.61681	6.21624	4.08171	3.92034	4.01708	0.319	0.310907	0.286209	0.217198	0.262843	0.274	0.274076	0.254	1.26068	1.48164	1.67714	1.86543	2.25778	4.20728	3.2208	2.75714	0.220005	0.219623	0.227775	0.208388	0.197818	0.191987	0.192406	0.192294	0.125344	0.125549	0.131723	0.139282	0.11858	0.130234	0.132527	0.130132	22.503
Lanxi	1.4075	1.5046	1.6114	1.727	1.8451	1.9655	2.0877	2.2116	2.23655	3.04239	2.91204	3.12002	2.48762	1.57239	1.49457	1.51446	0.661	0.573353	0.608149	0.555149	0.825294	0.882	0.905999	0.849	1.06549	1.29089	1.44287	1.62067	1.91329	3.44173	2.59022	2.20773	0.41749	0.417753	0.416236	0.404532	0.417324	0.407862	0.414003	0.409136	0.100308	0.101058	0.105513	0.111077	0.119592	0.128004	0.136519	0.134104	21.429
Qinggang	1.459	1.562	1.6698	1.7892	1.9095	2.0304	2.1514	2.2721	4.6417	4.39207	3.88132	3.57298	3.25358	2.05731	2.03878	2.09312	0.44	0.47648	0.517343	0.521235	0.593868	0.654	0.608674	0.582	0.985576	1.17841	1.5457	1.64111	2.05668	3.74519	2.95907	2.53778	0.304136	0.309791	0.305695	0.317374	0.316049	0.32157	0.317196	0.321873	0.102673	0.102748	0.106651	0.113781	0.116028	0.120745	0.124073	0.12296	24.324
Qingan	2.048	2.1894	2.347	2.511	2.6798	2.8531	3.0305	3.2119	4.88397	3.25521	3.01946	2.97146	2.33834	1.64052	1.57112	1.59578	0.435	0.363535	0.424023	0.427882	0.677604	0.723	0.735444	0.699	1.7601	2.13297	2.29365	2.4269	2.92964	4.82831	4.14909	3.80594	0.352539	0.337529	0.338678	0.339177	0.337914	0.334273	0.334935	0.33482	0.109126	0.125244	0.140548	0.143015	0.155439	0.158063	0.179364	0.179867	22.703
Mingshui	1.417	1.5063	1.6057	1.7069	1.8021	1.8911	1.9737	2.0501	3.13841	3.44091	3.80068	3.66484	2.6254	1.48912	1.42016	1.42659	0.389	0.370555	0.293971	0.303337	0.554932	0.615	0.614847	0.609	0.820894	0.959962	1.52792	1.71377	2.03902	4.09014	2.94127	2.47032	0.275308	0.278551	0.276233	0.280874	0.290525	0.295691	0.300376	0.304676	0.137444	0.145422	0.174714	0.183097	0.193278	0.203375	0.21438	0.2074	21.572
Suiling	1.4268	1.5423	1.6487	1.75	1.8455	1.935	2.0185	2.0959	3.27304	2.99051	3.70835	3.56359	2.42508	1.62583	1.46258	1.40703	0.977	1.0135	0.613282	0.612094	1.26397	1.382	1.53802	1.629	1.87059	2.17804	2.42324	2.86393	3.33536	5.47233	4.86068	4.47702	0.432131	0.442881	0.455376	0.45368	0.47534	0.483801	0.504711	0.509172	0.180768	0.174128	0.186764	0.197457	0.16316	0.176758	0.190573	0.191677	27.436
Anda	2.3095	2.4826	2.6514	2.9367	3.2506	3.5959	3.9752	4.3919	7.36077	16.0508	15.0497	14.6285	17.8276	13.8813	13.4869	13.6574	0.048	0.0409359	0.0350442	0.0365007	0.0468935	0.052	0.0524558	0.049	2.00052	2.19856	2.50067	2.85348	3.40446	5.08478	4.69585	4.45356	0.178116	0.178061	0.189424	0.189414	0.146342	0.146458	0.14606	0.151743	0.0903508	0.109135	0.112367	0.115478	0.108869	0.127221	0.135571	0.114908	37.561
Zhaodong	2.3229	2.4949	2.6621	2.94	3.2466	3.585	3.9585	4.3705	8.92055	17.1392	18.8883	19.932	13.0623	9.34687	8.95454	8.90118	0.05	0.0458532	0.041009	0.041563	0.119395	0.142	0.143822	0.139	1.66224	1.592	1.69703	1.66457	2.68054	3.33679	3.76091	3.58744	0.156541	0.149336	0.134297	0.124445	0.137517	0.140129	0.143806	0.140755	0.0897756	0.10194	0.111443	0.116273	0.119195	0.125986	0.13296	0.112303	23.352
Hailun	1.785	1.9279	2.0686	2.2179	2.3684	2.5197	2.6712	2.8223	3.58194	3.94984	3.32216	3.46098	2.78197	1.72147	1.64149	1.64138	0.401	0.369212	0.497807	0.465565	0.664006	0.715	0.726183	0.712	1.13939	1.34004	1.55723	1.84149	2.23276	4.21563	3.2403	2.797	0.278371	0.280694	0.28242	0.275546	0.276666	0.276093	0.276363	0.276251	0.0917237	0.0896021	0.0904537	0.0935723	0.0941457	0.10046	0.0843828	0.0884764	15.942
Huma	2.0799	2.2239	2.3685	2.5207	2.6788	2.8428	3.0126	3.1882	3.28167	4.78357	6.03097	6.72222	6.09109	4.60533	4.26679	4.39649	0.839	0.760024	0.496186	0.430748	0.404679	0.458	0.489234	0.452	1.15866	0.950547	0.569497	0.619252	0.724439	5.80703	6.51675	7.68013	0.32057	0.302041	0.288141	0.269678	0.316701	0.330695	0.335154	0.337629	0.0954801	0.100959	0.107524	0.109356	0.110254	0.144635	0.115932	0.142095	40.8
Tahe	1.9666	2.1141	2.2684	2.433	2.6023	2.776	2.9538	3.1354	3.54657	3.54216	3.75113	3.63679	5.66025	6.13301	3.93804	5.52687	0.841	2.83935	1.85208	1.80225	1.73111	0.878	1.73385	1.354	1.19938	1.53386	1.59711	1.4167	6.22567	10.0535	7.9548	6.99836	0.522693	0.637739	0.624148	0.622621	0.618422	0.536216	0.616578	0.619794	0.07937	0.108653	0.118268	0.137757	0.140492	0.131226	0.12515	0.150339	40.244
Mohe	2.1804	2.3509	2.5178	2.7391	2.9769	3.2323	3.5062	3.7998	3.96969	3.96399	3.94948	3.92619	4.9258	13.1909	4.22511	7.30376	0.247	1.81583	3.08356	2.94969	2.80905	0.268	2.01704	1.729	1.47361	1.09664	1.01861	1.15539	4.59541	7.99492	6.31926	5.53682	0.485862	0.851315	0.849635	0.848694	0.848191	0.499203	0.840442	0.837043	0.0727221	0.0749844	0.0826745	0.120066	0.119096	0.108426	0.116256	0.126683	52.308
[truncated: 71 more columns]

## Sheet: Rural Panel Data
	Output of primary industry								Number of employment in primary industry									agricultural acreage (Hectares)							Area of the administrative region								GDP per capita								(Number of fixed telephone users								Number of villages with internet access
	2015	2016	2017	2018	2019	2020	2021	2022	2015	2016	2017	2018	2019	2020	2021	2022		2016	2017	2018	2019	2020	2021	2022	2015	2016	2017	2018	2019	2020	2021	2022	2015	2016	2017	2018	2019	2020	2021	2022	2015	2016	2017	2018	2019	2020	2021	2022	2015
Yilan	488492	442390	237530	232292	260810	290030	304891	334356	90451	88572	90449	88575	90446	88578	90443	88581	176455	176455	176455	176455	176455	176455	176455	176455	4616	4616	4616	4616	4616	4616	4606	4606	5.0154	4.5962	4.0166	3.5798	2.8942	4.2161	4.6031	5.0462	42026	40864	26642	21451	17845	17578	14562	12667	132
Fangzheng	212488	219969	216016	231745	256563	274668	299080	349784	54920	54922	54922	54922	54922	54922	54922	54922	70613	72549	74478	76399	78311	80212	82101	64583.6	2976	2976	2976	2976	2976	2976	2976	2976	2.991	3.0416	2.9355	2.9081	2.8264	3.5587	3.8619	4.3489	31576	24358	32000	16222	14622	14030	11800	7619	67
Binxian	493729	511666	401912	370904	394561	432677	438286	474305	143419	143421	143421	143421	143421	143421	143421	143421	167604	167592	167598	167595	167596	167596	167596	167595	3845	3845	3843	3843	3843	3843	3843	3843	5.1405	5.5069	5.4568	5.3408	3.092	3.8568	4.0572	4.2826	48012	33145	31008	26000	12600	20000	16960	20399	143
Bayan	569278	569808	515411	363160	414394	458777	461897	484815	170805	170806	170806	170806	170806	170806	170806	170806	229012	229160	229268	229349	229408	229451	229484	229397	3139	3139	3143	3143	3143	3139	3139	3139	2.249	2.8889	2.8555	2.7934	1.8324	2.8652	3.0771	3.3725	79089	35882	29406	21489	20481	14948	14938	22481	116
Mulan	240496	260694	237471	212651	242504	263946	269643	290390	85489	85633	85576	85599	85590	85593	85592	85592	96788	96787	96787	96787	96787	96787	96787	96787.6	3600	3600	3600	3600	3600	3600	3171	3171	3.2521	3.178	3.2549	3.3175	3.234	4.5755	4.8817	5.309	6532	15763	16082	16211	6340	5088	5062	6069	86
Tonghe	217700	249036	467251	266047	311813	343597	356513	381366	43743	43815	43775	43797	43784	43791	43787	43797	122308	128372	134673	141215	148006	155052	162358	169931	5676	5676	5676	5676	5676	5676	5676	5676	2.9128	3.1464	4.095	3.293	3.67	4.8844	5.1568	5.595	35089	34647	18425	17635	15630	15537	15013	15102	82
Yanshou	244795	240883	160707	143617	173032	186291	191161	205895	71055	70923	70982	70955	70968	70962	70965	70964	78808	78808	78809	78809	78809	78809	78809	78808.9	3150	3150	3150	3150	3150	3150	3096	3096	3.1348	3.1601	2.7068	2.618	2.6024	3.6157	3.8782	4.1775	35891	32300	26732	24227	16090	8885	10317	11710	106
Shangzhi	593120	623392	556248	554357	607038	652073	702529	780861	105827	105826	105826	105826	105826	105826	105826	105826	132369	132369	132369	132369	132369	132369	132369	132369	8891	8891	8891	8891	8891	8891	8891	8891	5.2293	3.7763	3.7855	3.7933	3.2118	3.7991	4.0964	4.5241	76648	74400	39423	41800	42607	31617	30582	30600	163
Wuchang	1001056	1047433	914586	959002	1028818	1113343	1145341	1232294	261178	261367	261451	261489	261505	261513	261516	261454	258630	258630	258630	258630	258630	258630	258630	258630	7512	7512	7512	7512	7502	7502	7499	7499	4.4342	4.4679	4.6581	4.5952	3.1393	3.8727	4.0943	4.3593	121570	98256	85483	79346	21284	20110	20036	19835	261
Longjiang	402903	381465	421890	450066	500445	577811	570736	648241	184022	184911	184079	184857	184130	184809	184174	184761	352610	356913	360847	364440	367719	370708	373431	376946	5887	5887	5887	5887	5887	5887	5887	5887	1.783	1.6338	2.2847	1.7256	1.9767	2.9909	3.282	3.4729	40236	32613	31519	30258	30478	30184	13534	13214	158
Yian	311993	318025	284999	291142	340528	377906	379975	408008	172507	172844	172695	172761	172732	172745	172739	172748	265791	265791	265791	265791	265791	265791	265791	265792	3678	3678	3678	3678	3678	3678	3678	3678	1.5046	1.6093	1.3159	1.262	1.5342	2.0691	2.2056	2.325	8305	5258	8062	5373	5300	5214	6150	6100	149
Tailai	206868	221372	219604	230734	249854	294994	294752	321888	90557	90690	90799	90887	90958	91016	91063	91097	187028	188718	190145	191349	192363	193216	193934	199525	3917	3917	3917	3917	3917	3917	3917	3917	1.6615	1.5836	1.6386	1.7583	2.0172	2.5812	2.8144	3.0055	26606	19664	15132	8638	6366	6274	6401	7182	83
Gannan	339356	347110	374060	393583	402312	448428	442799	482167	133773	133771	133771	133771	133771	133771	133771	133816	267544	275000	282646	290489	298532	306779	315236	322887	4792	4792	4792	4791	4791	4791	4791	4791	1.5828	1.9499	2.0064	2.1389	2.2848	3.1198	3.2317	3.5348	25493	27700	26943	7459	6620	4628	19080	16000	95
Fuyu	317678	308640	268014	277329	316348	360675	352468	388316	84966	89052	85022	88994	85077	88938	85129	88745	178650	184008	189517	195179	201000	206983	213132	219656	4060	4060	4060	4060	4060	4060	4060	4060	3.0522	2.4182	2.3862	2.5483	2.528	3.3216	3.6444	4.0837	48270	47200	47200	45230	45200	43599	44562	44562	90
Keshan	314322	334590	259059	265289	327608	345522	331036	350085	103162	101227	70549	70623	70592	94224	92641	93162	195234	195234	125849	125849	125849	195234	195234	125850	3320	3320	2083	2083	2083	3320	3186	3186	1.7954	1.7175	1.4805	1.5541	1.4108	2.6208	2.7475	2.934	45772	37842	29173	5758	5612	5533	6119	6402	122
Kedong	140270	140502	140029	144801	159960	181132	173207	201130	70306	70726	99369	97585	95871	70605	70600	70593	125849	125849	195234	195234	195234	125849	125849	195234	2083	2083	3320	3320	3320	2083	2083	2083	1.1674	1.5051	1.55	1.7239	1.8725	3.6584	4.3651	4.7995	3650	12912	12912	12912	12200	12643	13600	13742	98
Baiquan	338263	293122	268487	267882	287335	321922	319228	356254	217751	218583	219171	219588	219882	220090	220237	220366	237182	237002	236897	236836	236800	236779	236767	236735	3599	3599	3599	3599	3599	3599	3597	3597	1.9261	1.517	1.5651	1.5437	1.1241	2.1772	2.3735	2.6246	45298	44195	10571	9163	9150	9217	8454	11207	186
Nehe	374959	381292	431605	447244	496900	553663	543102	596276	193674	190178	191759	191039	191366	191217	191285	191253	446802	457970	469397	481088	493050	505289	517809	531448	6660	6660	6660	6660	6660	6660	6660	6660	1.4205	1.6902	1.6959	1.6806	1.7166	2.5434	2.5885	2.8949	42597	34256	23785	17784	9200	10406	10800	11500	171
Linkou	389313	374031	354957	252311	275247	301188	320335	333000	90940	89436	88086	86874	85784	84802	83917	83921	171363	171383	171391	171394	171396	171396	171396	171397	6638	6638	6638	6638	6638	6638	6638	6638	3.6287	2.929	2.9557	2.5965	2.0534	2.8899	3.1922	3.3831	43710	42923	24975	21375	21375	21375	16110	18680	119
Suifenhe	10053	11200	15838	14548	14028	13292	14381	16194	1311	1311	1310	1310	1310	1310	1310	1309	4456	4456	4456	4456	4456	4456	4456	4456	422	422	422	422	422	422	422	422	10.383	13.4695	14.5313	14.4602	7.8722	4.3298	4.7611	5.4031	19288	15820	14368	15786	12303	9613	9746	11363	11
Hailin	445629	460268	201850	281267	286195	307360	325954	350247	36232	36231	36231	36231	36231	36231	36231	36232	93935	93935	93935	93935	93935	93935	93935	93938.5	8816	8816	8712	8712	8712	8712	8712	8712	6.5941	5.677	5.1106	5.2265	3.1499	3.8219	4.2459	4.5844	56857	58563	37017	31185	30723	28265	26836	26300	112
Ningan	561669	598069	557148	489664	558908	616081	664267	699253	104125	102595	101088	99604	98142	96702	95284	97860	180407	185285	190284	195407	200657	206036	211548	216527	7227	7227	7227	7227	7227	7227	7201	7201	6.2414	4.8215	4.854	4.655	2.7622	3.5582	3.9018	4.1621	58337	45155	35924	32230	31502	9535	8227	8606	240
Muling	305714	301160	213129	215590	252863	304464	326832	369268	50451	49153	47935	46790	45713	44700	43745	42855	121598	121598	121598	121598	121598	121598	121598	121598	6247	6247	6247	6040	6040	6040	6041	6041	8.5906	6.5401	6.45	6.3257	4.4164	6.4822	6.8512	7.5365	50281	38293	27894	24292	23224	33000	20810	20370	127
Dongning	367429	389239	268124	245005	246370	258885	286790	312152	32213	31604	31104	30694	30356	30077	29846	29661	71845	71799	71824	71811	71818	71814	71816	71814.9	7117	7117	7117	7117	7117	7117	7117	7117	12.5697	8.4224	7.671	7.5001	3.5301	3.6944	3.8764	4.2252	50359	37883	30029	27428	26815	10207	24168	24857	102
Huanan	494954	517826	578482	617359	652663	702194	675312	710601	132259	132259	63500	63500	63500	132259	132259	132269	228349	228349	140223	140223	140223	228349	228349	228349	4417	4417	2268	2268	2268	4417	4418	4418	3.2224	2.9252	3.2449	3.4816	2.6509	4.1476	4.4765	5.0211	39920	37820	36995	36716	36412	34400	4038	4038	192
Huachuan	245548	237943	368634	388815	412065	458994	451810	470897	63500	63500	132259	132259	132259	63500	63500	63500	140223	140223	228349	228349	228349	140223	140223	140223	2268	2268	4417	4417	4417	2268	2228	2228	3.851	2.3935	3.0479	3.326	3.0057	4.6483	4.8081	5.0648	31881	32698	32890	31850	10267	5600	5750	5680	105
Tangyuan	354132	397502	322447	338616	358577	389778	380131	428736	59446	59269	59431	59282	59419	59294	59409	59282	131598	135322	139147	143074	147106	151245	155495	159851	3420	3420	3420	3420	3420	3420	3420	3420	4.5412	3.48	3.3517	3.5708	2.7087	3.9165	4.0561	4.4396	14681	11263	7387	4888	5650	6719	8961	2684	137
Fuyuan	350368	341300	500834	534965	557441	609865	583637	577377	44493	44493	44493	44493	44493	44493	44493	44493	153321	153320	153320	153320	153320	153320	153320	153319	6047	6047	6047	6047	6047	6047	6041	6041	6.2881	4.2886	5.644	5.9522	6.0927	8.4025	8.0916	8.3195	9332	11377	6356	6718	7150	4000	5261	5142	49
Tongjiang	757289	799758	666022	714891	636632	705401	676756	697869	35980	35980	35980	35980	35980	35980	35980	35980	146996	146973	146985	146979	146982	146981	146982	146979	6229	6229	6229	6229	6229	6229	6229	6229	7.7604	5.3896	4.9025	5.2302	4.9859	6.2959	6.3348	6.6127	32421	25400	9093	6986	1896	6455	9360	8536	85
Fujin	1116941	1038983	856372	741026	646942	753303	710063	735255	139072	139071	139071	139071	139071	139071	139071	139240	418635	435122	452194	469871	488171	507114	526719	544420	8224	8224	8224	8224	8224	8224	8224	8224	6.2296	4.346	4.1934	4.1465	3.1014	3.7415	4.0741	4.482	39200	39200	16537	12737	26775	14031	11900	12729	267
Zhaozhou	440959	448694	428281	450660	504908	556657	560192	573501	129849	129853	118250	118195	118164	129854	129854	129858	148520	148520	196357	199840	203215	148520	148520	148520	2446	2446	4120	4120	4120	2446	2446	2446	6.3104	4.5913	2.9982	2.6846	3.0669	4.4329	5.0426	5.7231	40724	40535	40429	14320	14219	14177	13887	13660	104
Zhaoyuan	401973	417690	421635	424481	479495	537253	553866	567141	118511	118345	129854	129854	129854	118147	118136	118097	189067	192766	148520	148520	148520	206483	209645	212315	4120	4120	2446	2446	2446	4120	4120	4120	4.673	3.4324	2.3886	2.3043	2.3596	3.3906	3.9542	4.4213	47867	53000	47200	22526	22958	33937	30981	16004	135
Lindian	179789	188931	245799	235041	269099	321237	346984	354717	80118	79779	80072	79819	80038	79848	80012	79897	204709	213512	222691	232260	242237	252638	263481	273597	3504	3504	3504	3504	3504	3504	3504	3504	2.5829	2.1318	1.7996	1.8029	2.4639	3.675	4.4829	5.3719	15700	12421	10825	6200	5928	6091	6374	6687	83
Durbert Mongolian Autonomous County	330058	373330	333238	349809	416014	456674	460456	474004	75519	75525	75526	75526	75526	75526	75526	75525	161848	161848	161848	161848	161848	161848	161848	161847	6054	6054	6054	6054	6054	6054	6040	6040	8.9719	4.3346	4.4503	3.315	4.2741	5.2262	5.7077	6.2354	58232	58030	34200	19339	12795	12602	7156	7001	4
Jidong	338541	334964	277185	302439	317995	333159	315015	372932	76809	76922	76855	76894	76871	76885	76877	76879	105294	106453	107413	108207	108863	109405	109851	110342	3243	3243	3243	3243	3243	3243	3243	3243	6.1342	3.1678	2.9722	3.1202	3.1801	4.0242	4.4093	4.9607	58436	60189	60247	53017	50366	50309	50268	49985	123
Hulin	816416	798392	870453	931573	1004666	1053400	995379	1039181	43090	42890	43010	42938	42982	42955	42971	42961	221106	234798	249277	264585	280765	297863	315926	325497	9334	9334	9334	9334	9334	9334	9334	9334	7.8741	4.6779	5.0614	5.453	5.6274	5.9094	6.0595	6.4143	41700	34300	32300	25824	22142	12000	19149	22929	85
Mishan	573808	564745	559164	583359	647989	679810	649245	718399	78372	78359	78363	78362	78362	78362	78362	78382	217614	225972	234626	243586	252862	262465	272405	281832	7731	7731	7731	7731	7731	7731	7728	7728	4.9623	3.1676	3.2354	3.4479	3.502	4.1037	4.2931	4.5831	35230	26300	35928	19233	14366	14000	13906	23200	11
Jixian	184562	182041	213037	244066	295695	319259	306194	325190	73639	73655	73640	73653	73642	73652	73643	73616	127138	127138	127138	127138	127138	127138	127138	127138	2258	2258	2258	2258	2258	2258	2217	2217	7.2519	2.2167	2.4723	2.7009	2.3549	2.9418	3.1329	3.1329	37396	40400	19080	18500	11896	13781	13500	6688	155
Youyi	153029	158508	187458	223579	175296	193372	184163	181262	87864	87770	87447	87835	87146	87138	86689	67028	1106	1082	1070	1066	1063	1062	1062	1061.63	1647	1647	1647	1647	1647	1647	1647	1647	5.9257	3.5734	4.0229	4.4452	3.5619	4.1177	4.3048	4.3048	10018	9879	9807	9887	9786	6492	6347	7568	46
Baoqing	846608	771685	818979	967531	768213	847243	801615	866399	66968	67060	67010	67037	67023	67031	67026	67028	158925	158925	158925	158925	158925	158925	158925	158925	10001	10001	10001	10001	10001	10001	9995	9995	8.2874	3.5006	3.766	4.2866	2.9531	3.8416	3.9502	3.9502	54101	50572	50579	50551	50201	50195	43181	43012	145
Raohe	356417	333711	357320	412057	433348	482260	461086	466009	22370	22352	22358	22356	22356	22356	22356	22356	90000	90000	90000	90000	90000	90000	90000	90000.2	6765	6765	6598	6598	6598	6598	6598	6598	4.6281	3.4244	3.7642	4.3409	4.5822	5.2136	5.3356	5.3356	17908	14328	14328	14346	14346	13546	12201	6160	79
Jiayin	162743	134241	95606	128432	133068	140588	155432	170014	20209	20256	20273	20279	20282	20283	20283	20283	95775	95775	95775	95775	95775	95775	95775	95775.4	6739	6739	6739	6739	6739	6739	6739	6739	4.8275	3.3241	2.9151	3.4058	3.5035	4.3653	4.7963	5.3453	8259	8801	5131	5010	4910	4860	4718	4622	73
Tieli	371026	364692	344941	407877	379005	416546	369681	395160	31733	31735	31734	31735	31734	31734	31734	31734	143095	151336	160046	169251	178980	189261	200126	210860	6443	6443	6443	6443	3776	3776	3776	3776	2.5329	2.0126	2.0464	2.3272	2.7853	3.3837	3.5833	4.2183	24000	20000	20000	19800	18786	8880	8400	9067	71
Boli	168670	163587	144227	152728	159749	174085	183788	230971	68252	68350	68319	68329	68326	68327	68327	68327	122240	122052	122205	122080	122182	122099	122167	122109	2576	2576	2575	2575	2575	2390	2390	2390	3.08	1.6353	1.8354	2.01655	1.9083	2.47	2.0239	3.5013	63147	63018	63015	62870	64170	63176	65382	64563	13
Luobei	458714	440201	466458	434775	463154	495457	472916	500718	23501	23501	23501	23501	23501	23501	23501	23501	73034	74306	73331	74076	73505	73942	73607	73863.4	2077	2077	2077	2077	6768	6768	6768	6768	6.3332	3.7564	4.0101	4.0204	4.4957	4.9479	5.2149	5.8118	12462	12000	3368	3368	3487	8100	8070	1400	63
Suibin	348702	356128	377274	357008	363628	389300	369707	378258	45980	45971	45968	45966	45965	45965	45965	45964	86655	86443	86625	86470	86602	86489	86586	86510.2	3344	3344	3344	3344	3344	3344	3344	3344	4.9041	2.7673	3.0276	2.9921	3.3059	4.2061	4.2789	4.51	10021	6200	5200	3000	4032	3860	4520	4366	109
Nenjiang	950320	964607	950831	1016839	183302	1251543	1272496	1281945	82928	82712	82819	82766	82792	82779	82786	82784	370031	370277	370148	370216	370180	370199	370189	370194	15109	15109	15109	15109	15109	15109	15211	15211	4.0352	4.0066	4.1369	4.4859	4.8457	6.5881	7.0463	7.3745	46545	17655	6800	6815	27333	19685	48248	42712	147
Sunke	156711	153837	158308	167609	1128612	206357	208374	229245	32416	32416	32416	32416	32416	32416	32416	32416	117461	117475	117481	117484	117485	117486	117486	117486	17344	17344	17344	17344	17344	17344	17027	17027	2.5452	2.6316	2.7841	3.1909	4.0162	4.7735	5.1317	5.7229	9986	11606	8040	9370	8712	8649	15623	4945	78
Sunwu	75140	73822	70880	80477	83251	93856	99612	101438	24468	24468	24468	24468	24468	24468	24468	24468	174028	186766	199938	213524	227504	241858	256562	271655	4319	4319	4319	4319	4319	4319	4314	4314	1.6529	1.5237	1.5761	1.812	2.6696	2.9935	3.2146	3.4157	8614	8141	6821	6854	6797	7252	10219	17086	94
Beian	355532	360831	344028	321359	317210	376605	387038	386175	53897	53627	53477	53393	53347	53321	53307	53298	160599	160736	160827	160886	160925	160951	160968	161002	7194	7194	7194	7194	7194	7194	7194	7194	3.0674	2.5736	2.6848	2.7582	2.8781	4.005	4.2863	4.501	30000	30000	16000	16000	15000	31000	32510	31170	62
Wudalianchi	525280	514698	500966	525560	598815	662044	683999	645856	60805	60805	60805	60805	60805	60805	60805	60804	170219	170176	170159	170153	170151	170150	170150	170148	9874	9874	9874	8745	8745	8745	8745	8745	2.6477	2.9917	2.5455	3.2653	3.3156	4.5884	4.823	4.8962	28807	19773	19745	10332	13837	9928	10984	8157	105
Wangkui	390350	411912	383773	345370	377627	415064	413490	417922	140158	140158	140158	140158	140158	140158	140158	140158	155526	156184	156827	157454	158068	158667	159252	158874	2316	2316	2316	2316	2316	2316	2316	2316	2.2544	1.7154	1.7244	1.7146	1.649	2.6517	2.7457	2.9151	48000	28000	28350	29000	28449	25210	27220	27247	109
Lanxi	284449	286535	332399	340478	382978	417467	427808	448276	126315	126046	126190	126113	126154	126132	126144	126133	166214	166214	166214	166214	166214	166214	166214	166214	2499	2499	2499	2484	2484	2484	2484	2484	1.523	1.3032	1.4874	1.5587	1.4787	2.3855	2.5046	2.7081	56049	56750	48490	41180	27332	20160	20513	11560	105
Qinggang	290266	325336	384940	393763	429466	467374	475209	492368	129366	126596	129356	126606	129346	126616	129336	126624	144070	144070	144070	144070	144070	144070	144070	144070	2685	2685	2685	2685	2685	2685	2685	2685	1.0996	1.228	1.482	1.67	1.7184	2.743	2.9608	3.1923	38560	38061	37210	35850	33950	32452	22690	29351	128
Qingan	360079	367184	412689	439044	484313	516072	540567	556740	131250	131248	131248	131248	131248	131248	131248	131248	176984	176984	176984	176984	176984	176984	176984	176988	5469	5467	5467	5467	5467	5467	5467	5467	1.2909	2.3641	2.4559	2.631	2.3289	3.3142	3.5645	3.7997	89998	27387	27603	27652	27320	27212	27926	27926	93
Mingshui	308529	306264	246269	259509	289252	315942	319861	328728	131167	131163	131161	131160	131160	131160	131160	131159	134668	134668	134668	134668	134668	134668	134668	134668	2308	2308	2308	2308	2308	2308	2308	2308	1.9252	1.8313	1.6805	1.7798	1.5137	2.6294	2.7929	2.9439	36907	36611	21257	21242	21135	21811	23600	24835	99
Suiling	404531	437398	264329	269374	296189	312638	330850	367437	55579	57322	55592	57309	55604	57296	55617	57286	133004	135857	138748	141677	144645	147651	150696	155166	4238	4238	4238	4238	4238	4238	4311	4311	2.2766	2.5176	2.0907	2.1549	1.7378	2.4292	2.6445	2.9334	33121	30152	30089	8900	10000	10500	12793	19050	76
Anda	593675	524040	389740	356066	388833	424831	422342	401041	112986	113564	114142	114719	115295	115870	116445	111399	122515	122515	122515	122515	122515	122515	122515	141401	3586	3586	3586	3586	3586	3586	3586	3586	14.914	7.023	6.4742	5.8129	4.0341	5.0448	5.1267	5.4208	34100	26977	21450	20000	19550	18960	15358	15200	7
Zhaodong	836655	834611	836187	822083	896261	1025034	1024761	1052158	235477	235325	235241	235195	235169	235154	235146	235244	252231	252231	252231	252231	252231	252231	252231	252227	4332	4332	4323	4323	4323	4323	4323	4323	7.9855	4.5129	4.589	4.2192	2.4437	3.2762	3.3839	3.5254	102568	91330	96966	88550	66065	78453	59405	65432	186
Hailun	631767	612637	804951	815542	761620	817070	858492	893339	259647	259366	259271	259238	259227	259223	259222	259218	290929	290929	290929	290929	290929	290929	290929	290932	4667	4667	4667	4667	4667	4667	4642	4642	1.6944	1.6197	1.8773	1.9524	1.5905	2.5599	2.7783	2.9483	131243	131418	129840	120410	119200	118720	118235	118220	243
Huma	96758	103999	71611	70704	77566	82150	85161	90204	8446	8342	8422	8360	8408	8371	8399	8377	58012	58085	58130	58158	58176	58187	58194	58189.2	14335	14335	14335	14335	14335	14335	14205	14205	4.1609	3.4291	2.8414	2.9208	3.7426	4.6517	4.8573	5.4661	7050	4460	2096	1907	3634	3329	3584	3695	54
Tahe	92235	130650	94066	97508	109126	95195	119365	93131	3807	3807	3807	3807	3807	4354	3807	3807	6093	6093	6093	6093	6093	6093	6093	6093.22	14059	14059	14059	14059	14059	14059	14063	14063	3.8183	2.661	2.3165	2.5212	2.9254	4.0593	4.592	5.1375	43167	43167	43180	43180	43180	28899	23156	18850	17
Mohe	81550	74421	97839	100928	110027	90748	114319	97928	3891	1691	1691	1691	1691	4083	1691	1691	2730	2730	2730	2730	2730	2730	2730	2729.99	18428	18428	18428	18428	18428	18428	18428	18428	8.5188	4.0639	3.791	4.1075	4.7024	6.283	7.9327	9.2113	12780	11350	10210	9750	8940	7193	6834	2896	7
[truncated: 71 more columns]

## Sheet: Rural Computing Data
	Agricultural labor productivity								Per capita output efficiency of primary industry								Agricultural production foundation								Share of agricultural employment								Information connectivity level								Rural economic level								Fertilizer input intensity
	2015	2016	2017	2018	2019	2020	2021	2022	2015	2016	2017	2018	2019	2020	2021	2022	2015	2016	2017	2018	2019	2020	2021	2022	2015	2016	2017	2018	2019	2020	2021	2022	2015	2016	2017	2018	2019	2020	2021	2022	2015	2016	2017	2018	2019	2020	2021	2022	2015
Yilan	5.40063	4.99469	2.62612	2.62255	2.8836	3.27429	3.37108	3.77458	1.07681	1.0867	0.653817	0.732596	0.996337	0.776616	0.732351	0.748004	0.382	0.382268	0.382268	0.382268	0.382268	0.382	0.383098	0.383	0.346844	0.360343	0.346811	0.360335	0.346828	0.360318	0.34685	0.360297	3.34822	3.31052	2.85423	2.68766	2.57199	2.56339	2.46669	2.87264	1.4047	1.4585	1.5504	1.7274	1.9243	1.9569	2.3873	2.6507	0.0790476
Fangzheng	3.86905	4.00512	3.93314	4.21953	4.67141	5.00106	5.44554	6.36874	1.29356	1.31678	1.33985	1.45096	1.65278	1.4053	1.41007	1.46445	0.237	0.24378	0.250262	0.256717	0.263142	0.27	0.275877	0.217	0.230597	0.230946	0.231237	0.231462	0.231645	0.231785	0.231892	0.231978	3.99829	3.5415	4.02512	3.02661	2.92536	2.88789	2.74676	3.22893	1.1269	1.2061	1.2954	1.4258	1.5692	1.6662	1.9007	2.0897	0.148689
Binxian	3.44256	3.56758	2.80232	2.58612	2.75107	3.01683	3.05594	3.30708	0.669694	0.647838	0.513547	0.48422	0.889738	0.782211	0.753214	0.772214	0.436	0.43587	0.436112	0.436105	0.436107	0.436	0.436107	0.436	0.415766	0.413986	0.415424	0.414257	0.415205	0.414434	0.415062	0.414553	2.81537	2.56339	2.52685	2.44184	2.2141	2.33987	2.2882	2.63484	1.2731	1.366	1.4712	1.6381	1.8238	1.8294	2.2607	2.5143	0.241057
Bayan	3.33291	3.336	3.01752	2.12615	2.42611	2.68595	2.70422	2.8384	1.48195	1.15476	1.05674	0.761135	1.32401	0.93744	0.878821	0.84163	0.73	0.730041	0.729456	0.729714	0.729901	0.731	0.731074	0.731	0.46572	0.479037	0.491844	0.504163	0.516015	0.527423	0.538406	0.548984	2.94976	2.42325	2.34051	2.24431	2.22865	2.16355	2.16088	2.40202	1.1137	1.1927	1.2786	1.3715	1.4667	1.6471	1.6631	1.7651	0.148916
Mulan	2.81318	3.04432	2.77497	2.48427	2.83332	3.08373	3.15033	3.39272	0.865035	0.957935	0.852552	0.748838	0.876104	0.673966	0.645335	0.639051	0.269	0.268853	0.268853	0.268853	0.268853	0.269	0.305225	0.305	0.30618	0.313745	0.322776	0.331017	0.339364	0.34747	0.355467	0.363316	2.22186	2.53498	2.54603	2.55029	2.21524	2.17273	2.17185	2.37789	0.9917	1.0188	1.0983	1.2126	1.3387	1.4194	1.6315	1.7994	0.116101
Tonghe	4.9768	5.68381	10.6739	6.07455	7.12162	7.84629	8.14198	8.70758	1.7086	1.80645	2.60657	1.84469	1.9405	1.6064	1.57888	1.55632	0.215	0.226166	0.237267	0.248793	0.260758	0.273	0.286043	0.299	0.424533	0.423881	0.42446	0.424178	0.424349	0.424257	0.42431	0.424178	3.91351	3.8892	3.00469	2.96161	2.85228	2.84723	2.81864	3.64217	1.2545	1.3508	1.4629	1.5511	1.6358	1.8859	1.7942	1.8746	0.105923
Yanshou	3.44515	3.3964	2.26405	2.02406	2.43817	2.62522	2.69374	2.9014	1.099	1.07478	0.836432	0.773131	0.936893	0.726062	0.694584	0.69453	0.25	0.250184	0.250187	0.250187	0.250187	0.25	0.254551	0.255	0.210114	0.211581	0.210925	0.211225	0.211081	0.211148	0.211114	0.211125	3.52316	3.36172	3.11913	3.00776	2.66534	2.36395	2.42219	2.89712	0.6347	0.7045	0.7827	0.7804	0.7811	1.0559	0.781	0.7809	0.175232
Shangzhi	5.60462	5.89073	5.25625	5.23838	5.73619	6.16175	6.63853	7.37873	1.07177	1.55992	1.38852	1.38096	1.78597	1.6219	1.62058	1.63098	0.149	0.14888	0.14888	0.14888	0.14888	0.149	0.14888	0.149	0.336171	0.336323	0.336256	0.336285	0.336273	0.336281	0.336277	0.336277	3.73838	3.68738	2.89411	2.94802	2.96632	2.71707	2.6936	3.3876	1.4637	1.5646	1.6788	1.7871	1.8945	2.1582	2.1053	2.2078	0.106994
Wuchang	3.83285	4.00752	3.49812	3.66747	3.93422	4.25731	4.37962	4.71323	0.864384	0.896958	0.750975	0.798108	1.25322	1.09931	1.06969	1.08119	0.344	0.344289	0.344289	0.344289	0.344748	0.345	0.344886	0.345	0.232355	0.231231	0.23144	0.230964	0.231209	0.23095	0.231129	0.231162	3.35086	3.09278	2.95128	2.88331	2.237	2.22396	2.22316	2.44408	1.3818	1.4928	1.6152	1.7964	1.9977	2.1092	2.4693	2.7551	0.175712
Longjiang	2.18943	2.06297	2.2919	2.43467	2.71789	3.12653	3.0989	3.50854	1.22795	1.26268	1.00315	1.41091	1.37496	1.04535	0.94421	1.01026	0.599	0.606273	0.612956	0.619059	0.624629	0.63	0.634332	0.64	0.226402	0.222661	0.226159	0.222888	0.225945	0.22309	0.22576	0.223292	2.70697	2.57303	2.55381	2.53165	2.53551	2.53035	2.2378	2.46998	1.1413	1.2725	1.4176	1.5222	1.6191	1.8433	1.7896	1.8633	0.119498
Yian	1.80858	1.83995	1.6503	1.68523	1.97142	2.18765	2.19971	2.36187	1.20203	1.14333	1.25412	1.33536	1.28498	1.0573	0.997328	1.01586	0.723	0.722651	0.722651	0.722651	0.722651	0.723	0.722651	0.723	0.19594	0.194373	0.195068	0.19476	0.194895	0.194835	0.194863	0.194821	2.12939	2.08363	2.12565	2.08543	2.08263	2.08287	2.09591	2.19105	0.9553	1.0321	1.1363	1.072	1.0974	1.4831	1.0912	1.0896	0.0647345
Tailai	2.2844	2.44097	2.41857	2.53869	2.74692	3.24112	3.23679	3.53346	1.3749	1.54141	1.476	1.44383	1.36175	1.25566	1.15008	1.17567	0.477	0.481792	0.485435	0.488509	0.491098	0.493	0.495109	0.509	0.263219	0.262149	0.261256	0.26054	0.259963	0.259491	0.259108	0.258832	2.83648	2.61797	2.47565	2.27149	2.2001	2.1972	2.20119	2.42694	0.586	0.651	0.7239	0.7109	0.7199	1.0147	0.7179	0.715	0.130627
Gannan	2.5368	2.59481	2.79627	2.94221	3.00747	3.35221	3.31013	3.60321	1.60273	1.33074	1.39368	1.37557	1.31629	1.07449	1.02427	1.01935	0.558	0.573873	0.589829	0.606322	0.62311	0.64	0.657975	0.674	0.132201	0.128312	0.125423	0.12329	0.121713	0.120553	0.11969	0.118762	2.61376	2.65456	2.62427	2.16949	2.14755	2.10078	2.40937	2.74907	0.5696	0.6368	0.7119	0.7036	0.7105	1.0029	0.7095	0.7055	0.0556457
Fuyu	3.73888	3.46584	3.15229	3.11627	3.71837	4.05535	4.1404	4.37564	1.22498	1.43323	1.32105	1.22288	1.47088	1.2209	1.1361	1.07149	0.44	0.453222	0.466791	0.480736	0.495074	0.51	0.524956	0.541	0.162005	0.121637	0.161395	0.122217	0.160852	0.12277	0.160339	0.124673	3.75241	3.71359	3.71359	3.64207	3.64098	3.58286	3.61782	5.2356	0.7484	0.8382	0.9346	0.9865	1.0204	1.305	1.0562	1.065	0.0709169
Keshan	3.04688	3.30534	3.67204	3.75641	4.64087	3.66703	3.57332	3.75781	1.69705	1.92451	2.48027	2.4171	3.28953	1.3992	1.30057	1.28078	0.588	0.588054	0.604172	0.604172	0.604172	0.588	0.612787	0.395	0.481084	0.490823	0.645135	0.644762	0.644918	0.526048	0.534011	0.53139	2.78743	2.6523	2.50215	2.09921	2.09663	2.09532	2.10537	2.21563	1.0626	1.134	1.0701	1.1218	1.1649	1.5697	1.7831	1.9612	0.0598209
Kedong	1.99514	1.98657	1.40918	1.48384	1.66849	2.56543	2.45336	2.84915	1.70904	1.31989	0.90915	0.860749	0.89105	0.701243	0.562039	0.593635	0.604	0.604172	0.588054	0.588054	0.588054	0.604	0.604172	0.937	0.405627	0.402945	0.161811	0.177227	0.191876	0.40493	0.405018	0.405102	2.12859	2.4549	2.4549	2.4549	2.42981	2.44541	2.47913	2.96326	0.8854	0.9615	1.2145	1.3369	1.4717	1.4456	1.2299	1.2538	0.0532715
Baiquan	1.55344	1.34101	1.22501	1.21993	1.30677	1.46268	1.44947	1.61665	0.806521	0.883988	0.782705	0.790264	1.1625	0.671819	0.610691	0.615959	0.659	0.658522	0.65823	0.658061	0.657961	0.658	0.658235	0.658	0.190511	0.197177	0.203678	0.209854	0.215629	0.220959	0.225837	0.230192	2.79232	2.77303	2.1849	2.16027	2.16004	2.16122	2.14787	2.3439	0.595	0.6606	0.7333	0.7776	0.8134	1.0845	0.8644	0.882	0.116213
Nehe	1.93603	2.00492	2.25077	2.34111	2.5966	2.89547	2.83923	3.11773	1.36292	1.1862	1.32718	1.39302	1.51264	1.13842	1.09686	1.07697	0.671	0.687643	0.7048	0.722354	0.740315	0.759	0.777491	0.798	0.234862	0.248674	0.242428	0.245272	0.24398	0.244569	0.2443	0.244427	2.56313	2.45266	2.31431	2.23501	2.12157	2.13755	2.14272	2.29477	1.1404	1.2731	1.4182	1.32	1.3252	1.8215	1.325	1.325	0.0874213
Linkou	4.28099	4.18211	4.02966	2.90433	3.20861	3.55166	3.81728	3.96802	1.17976	1.42783	1.36335	1.11856	1.56258	1.22899	1.19582	1.17289	0.258	0.258185	0.258197	0.258201	0.258204	0.258	0.258204	0.258	0.382268	0.392485	0.401655	0.409888	0.417292	0.423962	0.429974	0.429946	3.39608	3.3709	2.79768	2.6827	2.6827	2.68273	2.51454	3.11122	1.2778	1.3786	1.4751	1.6326	1.8069	1.9997	2.2131	2.4455	0.0812434
Suifenhe	7.66819	8.5431	12.0901	11.1053	10.7084	10.1466	10.9779	12.3713	0.738533	0.634255	0.832002	0.767994	1.36028	2.34343	2.30574	2.28966	0.106	0.105592	0.105592	0.105592	0.105592	0.106	0.105592	0.106	0.766643	0.766435	0.766779	0.766655	0.766738	0.766655	0.766738	0.766874	15.2792	12.8916	11.8919	12.8682	10.4702	8.61824	8.70981	16.5329	1.6627	1.799	1.9393	2.0931	2.2547	2.4242	2.6016	2.7861	0.0807643
Hailin	12.2993	12.7037	5.5712	7.76316	7.89917	8.48334	8.99655	9.66679	1.8652	2.23775	1.09013	1.48535	2.50775	2.21967	2.11888	2.10863	0.107	0.106551	0.107823	0.107823	0.107823	0.108	0.107823	0.108	0.549235	0.537628	0.549214	0.537663	0.549181	0.537699	0.549147	0.537716	5.16823	5.26329	4.06269	3.73771	3.71197	3.575	3.49538	4.96088	1.5258	1.6556	1.788	2.0104	2.2601	2.5403	2.8548	3.2043	0.0926024
Ningan	5.39418	5.82942	5.51151	4.91611	5.69489	6.37092	6.97144	7.14544	0.864258	1.20905	1.13546	1.05609	2.06172	1.79049	1.78672	1.71679	0.25	0.256379	0.263296	0.270385	0.277649	0.285	0.293776	0.301	0.423322	0.431783	0.440132	0.448351	0.456449	0.464424	0.472277	0.45801	3.36729	3.05839	2.84202	2.75544	2.73837	2.22348	2.19283	2.39453	1.5252	1.6526	1.7865	1.9517	2.1291	2.3194	2.5231	2.7415	0.106195
Muling	6.05962	6.12699	4.44621	4.60761	5.53153	6.81128	7.4713	8.61668	0.705378	0.936834	0.689335	0.728395	1.2525	1.05077	1.09051	1.14333	0.195	0.19465	0.19465	0.201321	0.201321	0.201	0.201288	0.201	0.460682	0.474558	0.487578	0.499818	0.511331	0.52216	0.532369	0.541883	4.69098	4.09629	3.49337	3.32976	3.24342	3.80654	3.11423	4.20408	1.4794	1.6023	1.7241	1.8237	1.9057	1.9725	2.0265	2.0698	0.0904276
Dongning	11.4062	12.3161	8.62024	7.98218	8.11602	8.60741	9.60899	10.524	0.907439	1.46231	1.12374	1.06428	2.29909	2.32985	2.47884	2.49077	0.101	0.100884	0.100919	0.100901	0.10091	0.101	0.100908	0.101	0.484097	0.495482	0.504674	0.512089	0.518128	0.523049	0.52708	0.530286	5.23488	4.43167	3.92796	3.7608	3.7215	2.65543	3.55157	5.14818	2.0004	2.1604	2.3224	2.6146	2.9435	3.3137	3.7305	4.1919	0.110658
Huanan	3.74231	3.91524	9.10995	9.72219	10.2782	5.30923	5.10598	5.37239	1.16134	1.33845	2.80747	2.79245	3.87723	1.28007	1.14062	1.06996	0.517	0.516978	0.618267	0.618267	0.618267	0.517	0.516861	0.517	0.222418	0.222418	0.626668	0.626668	0.626668	0.222418	0.222418	0.222359	2.74686	2.70738	2.69186	2.68659	2.68089	2.64326	2.07551	2.15102	0.4657	0.5207	0.6313	0.6769	0.6972	0.6159	0.614	0.6147	0.155516
Huachuan	3.8669	3.74713	2.78721	2.9398	3.11559	7.22825	7.11512	7.4157	1.00413	1.56555	0.91447	0.883885	1.03656	1.55503	1.47982	1.46416	0.618	0.618267	0.516978	0.516978	0.516978	0.618	0.629367	0.629	0.181553	0.18287	-0.700206	-0.699114	-0.698415	0.184769	0.184894	0.184978	3.39039	3.42107	3.41828	3.36321	2.4363	2.23261	2.2411	2.47043	0.5051	0.5637	0.5827	0.6262	0.6104	0.706	0.7098	0.7114	0.276934
Tangyuan	5.9572	6.70674	5.42557	5.71195	6.03472	6.57365	6.39854	7.23214	1.31181	1.92723	1.61875	1.59963	2.2279	1.67845	1.57751	1.62901	0.385	0.395678	0.406863	0.418345	0.430135	0.442	0.454664	0.467	0.304408	0.306625	0.304648	0.306432	0.304805	0.306284	0.30493	0.306424	2.6959	2.53389	2.35015	2.2317	2.26782	2.31849	2.42476	2.55199	0.3921	0.4321	0.4805	0.4836	0.4824	0.4829	0.4827	0.4828	0.0934515
Fuyuan	7.87468	7.67087	11.2565	12.0236	12.5287	13.707	13.1175	12.9768	1.25231	1.78867	1.99441	2.02002	2.05635	1.6313	1.62113	1.55981	0.254	0.253547	0.253547	0.253547	0.253547	0.254	0.253799	0.254	0.0892287	0.0892287	0.0892287	0.0892287	0.0892287	0.0892287	0.0892287	0.0892287	3.3765	3.67827	2.9376	2.991	3.05473	2.59001	2.77607	3.53448	0.3967	0.4403	0.4901	0.5106	0.516	0.5173	0.5177	0.5177	0.0229009
Tongjiang	21.0475	22.2278	18.5109	19.8691	17.6941	19.6054	18.8092	19.396	2.71217	4.12421	3.77581	3.79892	3.54882	3.11399	2.96919	2.93315	0.236	0.23595	0.235969	0.235959	0.235964	0.236	0.235964	0.236	0.0667635	0.0667151	0.0666909	0.0666909	0.0666909	0.0666909	0.0666909	0.0666909	5.08492	4.42124	2.86538	2.66578	2.18048	2.61505	2.89113	3.70398	0.5885	0.6587	0.7338	0.8175	0.9108	1.0147	1.1305	1.2602	0.0773321
Fujin	8.03139	7.47088	6.1578	5.3284	4.65188	5.41668	5.10576	5.28049	1.28923	1.71902	1.46845	1.28504	1.49993	1.44773	1.25322	1.17815	0.509	0.529088	0.549847	0.571341	0.593593	0.617	0.640466	0.662	0.173538	0.188139	0.202245	0.215883	0.229071	0.241831	0.254179	0.265236	3.05588	3.05337	2.44151	2.33801	2.70654	2.36305	2.31083	2.63275	1.527	1.6293	1.7402	1.8464	1.9506	2.0524	2.1516	2.2477	0.0849662
Zhaozhou	3.39594	3.4554	3.62183	3.81285	4.27294	4.28679	4.31401	4.41637	0.538149	0.752597	1.208	1.42027	1.39324	0.96704	0.855514	0.771674	0.607	0.607195	0.476595	0.485049	0.49324	0.607	0.607195	0.607	0.287253	0.287231	0.35092	0.351222	0.351392	0.287225	0.287225	0.287203	3.02399	3.01344	3.0168	2.35805	2.35758	2.35456	2.34921	2.69242	1.1489	1.2234	1.2961	1.4045	1.5196	1.551	1.6267	1.6996	0.112201
Zhaoyuan	3.39186	3.52943	3.24699	3.26891	3.69257	4.54733	4.68838	4.80233	0.725843	1.02827	1.35937	1.41861	1.56491	1.34116	1.18567	1.08618	0.459	0.467879	0.607195	0.607195	0.607195	0.501	0.508847	0.515	0.399874	0.400703	0.342415	0.342412	0.342412	0.401696	0.401749	0.401947	2.86273	2.9379	2.81974	2.38395	2.38405	2.55644	2.49923	2.75598	1.1449	1.2136	1.3092	1.392	1.4727	1.6416	1.7707	1.9039	0.147227
Lindian	2.24405	2.36818	3.06972	2.94467	3.36214	4.02311	4.33665	4.43968	0.868811	1.11088	1.70578	1.6333	1.36456	1.09472	0.967376	0.826463	0.584	0.609338	0.635534	0.662842	0.691316	0.721	0.751943	0.781	0.26331	0.266427	0.263733	0.266059	0.264045	0.265793	0.264285	0.265342	2.61399	2.48684	2.4238	2.24288	2.23214	2.23857	2.24963	2.51151	0.6093	0.6818	0.7616	0.7785	0.7896	0.7969	0.8016	0.8046	0.0737461
Durbert Mongolian Autonomous County	4.37053	4.94313	4.41223	4.63164	5.50822	6.04658	6.09666	6.27612	0.487135	1.14039	0.991445	1.39718	1.28874	1.15697	1.06815	1.00653	0.267	0.267341	0.267341	0.267341	0.267341	0.267	0.26796	0.268	0.237051	0.23699	0.23698	0.23698	0.23698	0.23698	0.23698	0.23699	4.22302	4.19283	3.2808	2.71795	2.47098	2.4614	2.25913	2.5144	1.1591	1.2356	1.3185	1.3821	1.4391	1.4899	1.5348	1.5745	0.0769489
Jidong	4.40757	4.35459	3.6066	3.93319	4.13674	4.33321	4.09765	4.8509	0.718524	1.37464	1.21344	1.26056	1.30082	1.07679	0.92932	0.977865	0.325	0.328255	0.331215	0.333663	0.335686	0.337	0.338733	0.34	0.372972	0.373982	0.376172	0.377255	0.378629	0.379534	0.380464	0.381181	4.03759	4.10179	4.10599	3.85462	3.76277	3.76346	3.76042	5.51561	1.3505	1.4367	1.5373	1.6386	1.7398	1.8403	1.9399	2.0388	0.0557292
Hulin	18.9468	18.6149	20.2384	21.6958	23.3741	24.5233	23.164	24.1889	2.40621	3.97932	3.99857	3.97869	4.15363	4.14989	3.82275	3.7711	0.237	0.251551	0.267063	0.283464	0.300798	0.319	0.338468	0.349	0.142112	0.148332	0.147135	0.14917	0.148635	0.149339	0.149106	0.149355	4.93249	4.4121	4.27145	3.81603	3.5571	2.84388	3.34662	4.95907	1.5268	1.6462	1.7779	1.93	2.095	2.2739	2.4679	2.6765	0.0252751
Mishan	7.32159	7.20715	7.13556	7.44441	8.26917	8.67525	8.2852	9.16536	1.47544	2.27527	2.20546	2.15911	2.36127	2.11401	1.92989	1.99982	0.281	0.292293	0.303487	0.315077	0.327075	0.339	0.352491	0.365	0.294175	0.294292	0.294256	0.294265	0.294265	0.294265	0.294265	0.294085	3.12114	2.83699	3.14338	2.61208	2.45719	2.44554	2.44255	3.18087	1.4116	1.5193	1.6378	1.7851	1.9413	2.1066	2.2809	2.4644	0.0478105
Jixian	2.50631	2.47154	2.89295	3.31373	4.0153	4.3347	4.15782	4.41738	0.345607	1.11496	1.17015	1.2269	1.70508	1.47348	1.32715	1.41	0.563	0.563056	0.563056	0.563056	0.563056	0.563	0.573469	0.573	0.300741	0.300323	0.300386	0.300242	0.30034	0.300238	0.300324	0.300581	3.39976	3.51209	2.71413	2.6924	2.44523	2.51579	2.50527	2.7556	1.273	1.3307	1.4105	1.5685	1.744	1.9388	2.155	2.4069	0.140125
Youyi	1.74166	1.80595	2.14368	2.54544	2.01152	2.21915	2.12441	2.70427	0.293916	0.505386	0.532868	0.572627	0.564733	0.538929	0.493498	0.628199	0.007	0.00656952	0.00649666	0.00647237	0.00645416	0.006	0.00644809	0.006	0.165663	0.166239	0.169213	0.165503	0.172041	0.172109	0.176375	0.363173	2.22822	2.36975	2.36706	2.37004	2.36626	2.1436	2.23755	2.30733	1.2027	1.2434	1.3118	1.3846	1.4537	1.519	1.5804	1.6387	8.4077e-05
Baoqing	12.642	11.5074	12.2217	14.4328	11.4619	12.6396	11.9598	12.9259	1.52545	3.28726	3.24528	3.36696	3.88132	3.29018	3.02763	3.27222	0.159	0.158909	0.158909	0.158909	0.158909	0.159	0.159005	0.159	0.381598	0.380079	0.380936	0.380452	0.380718	0.380564	0.380662	0.380609	3.81565	3.69671	3.69708	3.69609	3.68437	3.68425	3.44881	4.89214	1.4727	1.5049	1.5786	1.6988	1.8236	1.9527	2.086	2.2243	0.0461514
Raohe	15.9328	14.9298	15.9818	18.4316	19.384	21.5718	20.6247	20.8449	3.44262	4.35983	4.24572	4.24603	4.23028	4.13761	3.86549	3.90676	0.133	0.133038	0.136405	0.136405	0.136405	0.136	0.136405	0.136	0.238079	0.235829	0.237032	0.236423	0.236736	0.23658	0.236658	0.236632	4.54755	4.03827	4.03827	4.04083	4.04083	3.92702	3.73569	4.61199	0.5318	0.5977	0.667	0.7196	0.7633	0.7993	0.8284	0.8519	0.0325113
Jiayin	8.053	6.62722	4.71593	6.33325	6.56089	6.93132	7.66317	8.38209	1.66815	1.99369	1.61776	1.85955	1.87267	1.58782	1.59772	1.56812	0.142	0.14212	0.14212	0.14212	0.14212	0.142	0.14212	0.142	0.211664	0.209769	0.209105	0.208871	0.208754	0.208715	0.208715	0.208715	3.22792	3.319	2.77233	2.75645	2.74298	2.73442	2.71577	3.4128	1.3184	1.4133	1.5193	1.6938	1.888	2.1039	2.344	2.5985	0.0549055
Tieli	11.6921	11.4918	10.8698	12.8526	11.9432	13.1262	11.6494	12.4523	4.6161	5.70992	5.31165	5.52277	4.28793	3.87924	3.25102	2.95196	0.222	0.234884	0.248403	0.26269	0.473994	0.501	0.529995	0.558	0.343994	0.339198	0.343049	0.339941	0.34245	0.340441	0.342055	0.340757	3.91243	3.59363	3.59363	3.57769	3.49689	2.7076	2.66932	3.39185	1.1363	1.2295	1.3315	1.4641	1.6098	1.77	1.9461	2.1399	0.104354
Boli	2.47128	2.39337	2.11108	2.23519	2.33804	2.54782	2.68983	3.38038	0.802365	1.46357	1.1502	1.10842	1.2252	1.03151	1.32903	0.965463	0.475	0.473804	0.474583	0.474097	0.474493	0.511	0.511159	0.511	0.218065	0.216942	0.217297	0.217183	0.217217	0.217206	0.217206	0.217206	4.00495	4.01564	4.00739	4.00722	4.04624	4.01592	4.08552	6.14498	1.0127	1.0816	1.1573	1.2302	1.3028	1.3748	1.446	1.516	0.20303
Luobei	19.5189	18.7312	19.8484	18.5003	19.7078	21.0824	20.1232	21.3062	3.082	4.98647	4.94961	4.6016	4.38371	4.26087	3.85879	3.66603	0.352	0.357756	0.353062	0.356649	0.108607	0.109	0.108757	0.109	0.212301	0.212301	0.212301	0.212301	0.212301	0.212301	0.212301	0.212301	3.72676	3.66424	2.46742	2.46758	2.4842	3.125	3.12083	3.31537	1.4829	1.5837	1.6946	1.6932	1.6935	1.6934	1.6935	1.6935	0.0498026
Suibin	7.58378	7.7468	8.20732	7.76678	7.91098	8.46949	8.04323	8.22944	1.54642	2.79941	2.71083	2.59576	2.39299	2.01362	1.87974	1.82471	0.259	0.258502	0.259046	0.258583	0.258977	0.259	0.258929	0.259	0.178841	0.178987	0.17904	0.179076	0.179094	0.179094	0.179094	0.179112	2.62997	2.38421	2.31772	2.18073	2.2395	2.22623	2.26103	2.51357	0.4791	0.5347	0.5973	0.6084	0.603	0.6056	0.6043	0.605	0.0661245
Nenjiang	11.4596	11.6622	11.4808	12.2857	2.21401	15.1191	15.3709	15.4854	2.8399	2.91076	2.77523	2.73874	0.456901	2.29491	2.18142	2.09986	0.245	0.24507	0.244985	0.24503	0.245006	0.245	0.243369	0.243	0.179572	0.17898	0.179482	0.179112	0.179367	0.179203	0.179305	0.179227	3.32114	2.49877	2.19294	2.19257	2.77537	2.55636	3.36841	4.58013	1.1852	1.2767	1.3763	1.5033	1.6421	1.7935	1.9588	2.139	0.0508943
Sunke	4.83437	4.74571	4.88364	5.17056	34.8165	6.3659	6.42812	7.07197	1.89941	1.80336	1.75412	1.62041	8.66902	1.33359	1.25263	1.23573	0.068	0.0677324	0.0677358	0.0677375	0.0677381	0.068	0.0689998	0.069	0.0829726	0.0829467	0.0829467	0.0829467	0.0829467	0.0829467	0.0829467	0.0829467	3.05022	3.20946	2.83049	2.95975	2.88519	2.87196	3.56339	4.05814	1.1997	1.2886	1.3981	1.5294	1.6731	1.8302	2.002	2.1894	0.155046
Sunwu	3.07095	3.01708	2.89684	3.28907	3.40244	3.83587	4.07111	4.14574	1.85792	1.9801	1.83798	1.81516	1.27451	1.2814	1.26644	1.21373	0.403	0.432429	0.462927	0.494383	0.526752	0.56	0.59472	0.63	0.203023	0.202555	0.202919	0.202633	0.202867	0.202685	0.202815	0.202711	2.74807	2.68927	2.56388	2.55328	2.53581	2.55998	2.76829	4.05959	0.9743	1.0893	1.2146	1.3137	1.4134	1.5133	1.6128	1.7116	0.0289873
Beian	6.59651	6.72853	6.4332	6.01875	5.94616	7.06298	7.26055	7.24558	2.15052	2.61444	2.39615	2.18213	2.066	1.76354	1.6939	1.60977	0.223	0.223431	0.223557	0.223639	0.223693	0.224	0.223753	0.224	0.318277	0.321409	0.323461	0.324439	0.325063	0.325375	0.325561	0.325666	3.6675	3.66727	2.88919	2.88916	2.83359	3.7228	3.80666	5.53896	1.1642	1.2607	1.3703	1.5146	1.6741	1.8503	2.0449	2.26	0.0609238
Wudalianchi	8.63876	8.46473	8.23889	8.64337	9.84812	10.888	11.2491	10.6219	3.26274	2.82941	3.23665	2.64704	2.97024	2.37294	2.33238	2.16942	0.172	0.172348	0.17233	0.194572	0.194569	0.195	0.194568	0.195	0.287747	0.291622	0.289462	0.290664	0.289993	0.290374	0.290159	0.290286	2.9986	2.68544	2.68447	2.35817	2.47967	2.34415	2.38077	2.66351	1.1801	1.2803	1.3827	1.5188	1.6683	1.8324	2.0126	2.2107	0.0438651
Wangkui	2.78507	2.93891	2.73815	2.46415	2.6943	2.9614	2.95017	2.98179	1.23539	1.71325	1.58788	1.43716	1.6339	1.11679	1.07447	1.02288	0.672	0.67437	0.677146	0.679853	0.682504	0.685	0.687617	0.686	0.239293	0.246008	0.252602	0.259078	0.265439	0.271683	0.277819	0.283845	3.06013	2.61841	2.62614	2.64049	2.62833	2.55679	2.60118	3.20296	0.9593	1.0533	1.1786	1.2854	1.3776	1.456	1.5217	1.5765	0.130767
Lanxi	2.2519	2.27326	2.63412	2.69979	3.0358	3.30976	3.39143	3.55399	1.4786	1.74437	1.77095	1.73207	2.05302	1.38745	1.35408	1.31236	0.665	0.665122	0.665122	0.669138	0.669138	0.669	0.669138	0.669	0.312527	0.313998	0.313218	0.313637	0.313414	0.313534	0.313468	0.313528	3.20304	3.21563	3.03472	2.87548	2.579	2.42307	2.4316	2.67023	0.6723	0.7368	0.8237	0.8966	0.9563	1.0043	1.0423	1.0721	0.204768
Qinggang	2.24376	2.56988	2.97582	3.11014	3.32029	3.69127	3.67422	3.88843	2.04052	2.09273	2.00797	1.86236	1.9322	1.34571	1.24096	1.21806	0.537	0.536574	0.536574	0.536574	0.536574	0.537	0.536574	0.537	0.24369	0.259902	0.243771	0.259848	0.243829	0.259789	0.243888	0.259743	2.7052	2.69566	2.67987	2.65488	2.6201	2.5927	2.41438	2.95043	0.8195	0.8992	0.9882	1.0568	1.1035	1.1347	1.1552	1.1686	0.129264
Qingan	2.74346	2.79764	3.14435	3.34515	3.69006	3.93204	4.11867	4.24189	2.12523	1.18338	1.28032	1.27144	1.58446	1.18642	1.15547	1.11638	0.324	0.323731	0.323731	0.323731	0.323731	0.324	0.323731	0.324	0.206172	0.207741	0.20914	0.210391	0.211511	0.212514	0.21341	0.214216	4.33758	2.70735	2.7097	2.70798	2.69677	2.69326	2.70734	3.41873	1.2209	1.3418	1.4773	1.6361	1.8119	2.0065	2.2221	2.4594	0.0717039
Mingshui	2.35218	2.33499	1.87761	1.97857	2.20534	2.40883	2.43871	2.50633	1.22179	1.27504	1.11729	1.11168	1.45692	0.916114	0.873181	0.851365	0.583	0.583484	0.583484	0.583484	0.583484	0.583	0.583484	0.583	0.312113	0.312152	0.312162	0.312168	0.312168	0.312168	0.312168	0.312173	3.42752	3.41489	2.82132	2.82069	2.81654	2.84258	2.91176	3.87109	0.7602	0.8324	0.9065	0.995	1.0865	1.1804	1.2765	1.3743	0.0621369
Suiling	7.27849	7.63054	4.7548	4.70038	5.32676	5.45654	5.94872	6.41408	3.19709	3.03088	2.27426	2.18125	3.06523	2.24623	2.24947	2.18657	0.314	0.320569	0.32739	0.334302	0.341305	0.348	0.349562	0.36	0.356084	0.330835	0.354025	0.332195	0.353171	0.332798	0.352756	0.333077	3.26672	3.15304	3.15063	2.34034	2.38241	2.40158	2.48922	3.21785	1.1449	1.2615	1.3561	1.3927	1.3974	1.398	1.398	1.3981	0.0797098
Anda	5.25441	4.61449	3.41452	3.10381	3.37251	3.66645	3.62697	3.60004	0.352314	0.657054	0.527404	0.533952	0.835999	0.726777	0.707466	0.664116	0.342	0.341648	0.341648	0.341648	0.341648	0.342	0.341648	0.394	0.261394	0.257917	0.254403	0.250864	0.247304	0.243728	0.240128	0.273185	2.94103	2.74446	2.59194	2.55192	2.5395	2.52322	2.42382	2.84328	1.2927	1.3977	1.4983	1.6087	1.7209	1.8344	1.9489	2.0646	0.0939557
Zhaodong	3.55302	3.54663	3.5546	3.49533	3.81114	4.35899	4.35798	4.47262	0.444934	0.785887	0.774591	0.828433	1.55958	1.3305	1.28786	1.26869	0.582	0.582251	0.583463	0.583463	0.583463	0.583	0.583463	0.583	0.265718	0.266459	0.266627	0.266805	0.266875	0.266924	0.266949	0.266643	3.34287	3.19583	3.26945	3.15937	2.86493	3.02724	2.77775	3.63456	1.2886	1.3902	1.5028	1.6732	1.8629	2.074	2.3088	2.5763	0.200416
Hailun	2.43318	2.36206	3.10467	3.14592	2.93804	3.152	3.3118	3.44628	1.43601	1.45833	1.6538	1.61131	1.84724	1.2313	1.19202	1.16891	0.623	0.623375	0.623375	0.623375	0.623375	0.623	0.626732	0.627	0.335362	0.349321	0.362494	0.375217	0.387603	0.399695	0.41151	0.423068	3.56123	3.55228	3.5271	3.41125	3.39309	3.39372	3.376	4.77282	0.8422	0.9271	1.0198	1.0892	1.1522	1.2087	1.2592	1.3036	0.174547
Huma	11.4561	12.4669	8.50285	8.45742	9.22526	9.81364	10.1394	10.7681	2.75327	3.63562	2.99249	2.89558	2.46493	2.10969	2.08746	1.96997	0.04	0.0405197	0.0405511	0.0405706	0.0405832	0.041	0.0409673	0.041	0.316335	0.326171	0.319049	0.32439	0.320346	0.323392	0.321128	0.322907	3.62013	3.02729	2.48379	2.44082	2.84111	2.77132	2.83107	3.68808	1.1802	1.2583	1.3413	1.4711	1.6135	1.7696	1.9407	2.1248	0.0444788
Tahe	24.2277	34.3184	24.7087	25.6128	28.6646	21.8638	31.3541	24.4631	6.34516	12.8968	10.6664	10.159	9.79851	5.3861	6.82798	4.76167	0.004	0.00433388	0.00433388	0.00433388	0.00433388	0.004	0.00433265	0.004	0.228728	0.234466	0.23799	0.24012	0.241331	0.133187	0.242539	0.24284	30.9906	31.0589	31.1167	31.156	31.1855	21.5462	17.6671	30.4208	0.9915	1.0586	1.1306	1.2271	1.331	1.4427	1.5627	1.6935	0.0236013
Mohe	20.9586	44.0101	57.8587	59.6854	65.0662	22.2258	67.6044	57.9113	2.46028	10.8295	15.2621	14.5308	13.8368	3.53745	8.52224	6.28698	0.001	0.00148144	0.00148144	0.00148144	0.00148144	0.001	0.00148144	0.001	0.217889	0.432169	0.431788	0.431979	0.431788	0.179626	0.431788	0.431979	13.8553	12.5288	11.4712	11.0445	10.2931	8.67254	8.33952	11.026	1.5163	1.621	1.7312	1.8174	1.88	1.925	1.957	1.9797	0.0459563
[truncated: 15 more columns]

## Sheet: County proximity matrix
NAME	Anda	Bayan	Baiquan	Baoqing	Beian	Binxian	Boli	Dongning	Durbert Mongolian Autonomous County	Fangzheng	Fuyuan	Fujin	Fuyu	Gannan	Hailin	Hailun	Huma	Hulin	Huachuan	Huanan	Jidong	Jixian	Jiayin	Kedong	Keshan	Lanxi	Lindian	Linkou	Longjiang	Luodei	Mishan	Mingshui	Mohe	Mulan	Luling	Nehe	Nengjiang	Ningan	Qinggang	Qingan	Raohe	Shangzhi	Suibin	Suifenhe	Suiling	Sunwu	Tahe	Tailai	Tangyuan
Anda	0	0	0	0	0	0	0	0	0	0	0	0	0	0	0	0	0	0	0	0	0	0	0	0	0	1	1	0	0	0	0	0	0	0	0	0	0	0	1	0	0	0	0	0	0	0	0	0	0
Bayan	0	0	0	0	0	1	0	0	0	0	0	0	0	0	0	0	0	0	0	0	0	0	0	0	0	0	0	0	0	0	0	0	0	1	0	0	0	0	0	1	0	0	0	0	0	0	0	0	0
Baiquan	0	0	0	0	1	0	0	0	0	0	0	0	0	0	0	1	0	0	0	0	0	0	0	1	1	0	0	0	0	0	0	1	0	0	0	0	0	0	0	0	0	0	0	0	0	0	0	0	0
Baoqing	0	0	0	0	0	0	0	0	0	0	0	1	0	0	0	0	0	1	0	1	0	0	0	0	0	0	0	0	0	0	1	0	0	0	0	0	0	0	0	0	1	0	0	0	0	0	0	0	0
Beian	0	0	1	0	0	0	0	0	0	0	0	0	0	0	0	1	0	0	0	0	0	0	0	1	0	0	0	0	0	0	0	0	0	0	0	0	0	0	0	0	0	0	0	0	1	0	0	0	0
Binxian	0	1	0	0	0	0	0	0	0	1	0	0	0	0	0	0	0	0	0	0	0	0	0	0	0	0	0	0	0	0	0	0	0	1	0	0	0	0	0	0	0	1	0	0	0	0	0	0	0
Boli	0	0	0	0	0	0	0	0	0	0	0	0	0	0	0	0	0	0	0	1	1	0	0	0	0	0	0	1	0	0	0	0	0	0	0	0	0	0	0	0	0	0	0	0	0	0	0	0	0
Dongning	0	0	0	0	0	0	0	0	0	0	0	0	0	0	0	0	0	0	0	0	0	0	0	0	0	0	0	0	0	0	0	0	0	0	1	0	0	0	0	0	0	0	0	1	0	0	0	0	0
Durbert Mongolian Autonomous County	0	0	0	0	0	0	0	0	0	0	0	0	0	0	0	0	0	0	0	0	0	0	0	0	0	0	1	0	0	0	0	0	0	0	0	0	0	0	0	0	0	0	0	0	0	0	0	1	0
Fangzheng	0	0	0	0	0	1	0	0	0	0	0	0	0	0	1	0	0	0	0	0	0	0	0	0	0	0	0	1	0	0	0	0	0	0	0	0	0	0	0	0	0	1	0	0	0	0	0	0	0
Fuyuan	0	0	0	0	0	0	0	0	0	0	0	0	0	0	0	0	0	0	0	0	0	0	0	0	0	0	0	0	0	0	0	0	0	0	0	0	0	0	0	0	1	0	0	0	0	0	0	0	0
Fujin	0	0	0	1	0	0	0	0	0	0	0	0	0	0	0	0	0	0	1	0	0	1	0	0	0	0	0	0	0	0	0	0	0	0	0	0	0	0	0	0	1	0	1	0	0	0	0	0	0
Fuyu	0	0	0	0	0	0	0	0	0	0	0	0	0	1	0	0	0	0	0	0	0	0	0	0	0	0	1	0	0	0	0	0	0	0	0	1	0	0	0	0	0	0	0	0	0	0	0	0	0
Gannan	0	0	0	0	0	0	0	0	0	0	0	0	1	0	0	0	0	0	0	0	0	0	0	0	0	0	0	0	1	0	0	0	0	0	0	1	0	0	0	0	0	0	0	0	0	0	0	0	0
Hailin	0	0	0	0	0	0	0	0	0	1	0	0	0	0	0	0	0	0	0	0	0	0	0	0	0	0	0	1	0	0	0	0	0	0	0	0	0	1	0	0	0	1	0	0	0	0	0	0	0
Hailun	0	0	1	0	1	0	0	0	0	0	0	0	0	0	0	0	0	0	0	0	0	0	0	0	0	0	0	0	0	0	0	1	0	0	0	0	0	0	1	0	0	0	0	0	1	0	0	0	0
Huma	0	0	0	0	0	0	0	0	0	0	0	0	0	0	0	0	0	0	0	0	0	0	0	0	0	0	0	0	0	0	0	0	1	0	0	0	1	0	0	0	0	0	0	0	0	0	1	0	0
Hulin	0	0	0	1	0	0	0	0	0	0	0	0	0	0	0	0	0	0	0	0	0	0	0	0	0	0	0	0	0	0	1	0	0	0	0	0	0	0	0	0	1	0	0	0	0	0	0	0	0
Huachuan	0	0	0	0	0	0	0	0	0	0	0	1	0	0	0	0	0	0	0	1	0	1	0	0	0	0	0	0	0	1	0	0	0	0	0	0	0	0	0	0	0	0	1	0	0	0	0	0	1
Huanan	0	0	0	1	0	0	1	0	0	0	0	0	0	0	0	0	0	0	1	0	0	1	0	0	0	0	0	0	0	0	0	0	0	0	0	0	0	0	0	0	0	0	0	0	0	0	0	0	0
Jidong	0	0	0	0	0	0	1	0	0	0	0	0	0	0	0	0	0	0	0	0	0	0	0	0	0	0	0	1	0	0	1	0	0	0	1	0	0	0	0	0	0	0	0	0	0	0	0	0	0
Jixian	0	0	0	0	0	0	0	0	0	0	0	1	0	0	0	0	0	0	1	1	0	0	0	0	0	0	0	0	0	0	0	0	0	0	0	0	0	0	0	0	0	0	0	0	0	0	0	0	0
Jiayin	0	0	0	0	0	0	0	0	0	0	0	0	0	0	0	0	0	0	0	0	0	0	0	0	0	0	0	0	0	1	0	0	0	0	0	0	0	0	0	0	0	0	0	0	0	0	0	0	0
Kedong	0	0	1	0	1	0	0	0	0	0	0	0	0	0	0	0	0	0	0	0	0	0	0	0	1	0	0	0	0	0	0	0	0	0	0	0	0	0	0	0	0	0	0	0	0	0	0	0	0
Keshan	0	0	1	0	0	0	0	0	0	0	0	0	0	0	0	0	0	0	0	0	0	0	0	1	0	0	0	0	0	0	0	0	0	0	0	1	0	0	0	0	0	0	0	0	0	0	0	0	0
Lanxi	1	0	0	0	0	0	0	0	0	0	0	0	0	0	0	0	0	0	0	0	0	0	0	0	0	0	0	0	0	0	0	0	0	0	0	0	0	0	1	0	0	0	0	0	0	0	0	0	0
Lindian	1	0	0	0	0	0	0	0	1	0	0	0	1	0	0	0	0	0	0	0	0	0	0	0	0	0	0	0	0	0	0	1	0	0	0	0	0	0	1	0	0	0	0	0	0	0	0	0	0
Linkou	0	0	0	0	0	0	1	0	0	1	0	0	0	0	1	0	0	0	0	0	1	0	0	0	0	0	0	0	0	0	0	0	0	0	1	0	0	0	0	0	0	0	0	0	0	0	0	0	0
Longjiang	0	0	0	0	0	0	0	0	0	0	0	0	0	1	0	0	0	0	0	0	0	0	0	0	0	0	0	0	0	0	0	0	0	0	0	0	0	0	0	0	0	0	0	0	0	0	0	1	0
Luodei	0	0	0	0	0	0	0	0	0	0	0	0	0	0	0	0	0	0	1	0	0	0	1	0	0	0	0	0	0	0	0	0	0	0	0	0	0	0	0	0	0	0	1	0	0	0	0	0	1
Mishan	0	0	0	1	0	0	0	0	0	0	0	0	0	0	0	0	0	1	0	0	1	0	0	0	0	0	0	0	0	0	0	0	0	0	0	0	0	0	0	0	0	0	0	0	0	0	0	0	0
Mingshui	0	0	1	0	0	0	0	0	0	0	0	0	0	0	0	1	0	0	0	0	0	0	0	0	0	0	1	0	0	0	0	0	0	0	0	0	0	0	1	0	0	0	0	0	0	0	0	0	0
Mohe	0	0	0	0	0	0	0	0	0	0	0	0	0	0	0	0	1	0	0	0	0	0	0	0	0	0	0	0	0	0	0	0	0	0	0	0	0	0	0	0	0	0	0	0	0	0	1	0	0
Mulan	0	1	0	0	0	1	0	0	0	0	0	0	0	0	0	0	0	0	0	0	0	0	0	0	0	0	0	0	0	0	0	0	0	0	0	0	0	0	0	1	0	0	0	0	0	0	0	0	0
Luling	0	0	0	0	0	0	0	1	0	0	0	0	0	0	0	0	0	0	0	0	1	0	0	0	0	0	0	1	0	0	0	0	0	0	0	0	0	1	0	0	0	0	0	0	0	0	0	0	0
Nehe	0	0	0	0	0	0	0	0	0	0	0	0	1	1	0	0	0	0	0	0	0	0	0	0	1	0	0	0	0	0	0	0	0	0	0	0	1	0	0	0	0	0	0	0	0	0	0	0	0
Nengjiang	0	0	0	0	0	0	0	0	0	0	0	0	0	0	0	0	1	0	0	0	0	0	0	0	0	0	0	0	0	0	0	0	0	0	0	1	0	0	0	0	0	0	0	0	0	1	0	0	0
Ningan	0	0	0	0	0	0	0	0	0	0	0	0	0	0	1	0	0	0	0	0	0	0	0	0	0	0	0	0	0	0	0	0	0	0	1	0	0	0	0	0	0	0	0	0	0	0	0	0	0
Qinggang	1	0	0	0	0	0	0	0	0	0	0	0	0	0	0	1	0	0	0	0	0	0	0	0	0	1	1	0	0	0	0	1	0	0	0	0	0	0	0	0	0	0	0	0	0	0	0	0	0
Qingan	0	1	0	0	0	0	0	0	0	0	0	0	0	0	0	0	0	0	0	0	0	0	0	0	0	0	0	0	0	0	0	0	0	1	0	0	0	0	0	0	0	0	0	0	1	0	0	0	0
Raohe	0	0	0	1	0	0	0	0	0	0	1	1	0	0	0	0	0	1	0	0	0	0	0	0	0	0	0	0	0	0	0	0	0	0	0	0	0	0	0	0	0	0	0	0	0	0	0	0	0
Shangzhi	0	0	0	0	0	1	0	0	0	1	0	0	0	0	1	0	0	0	0	0	0	0	0	0	0	0	0	0	0	0	0	0	0	0	0	0	0	0	0	0	0	0	0	0	0	0	0	0	0
Suibin	0	0	0	0	0	0	0	0	0	0	0	1	0	0	0	0	0	0	1	0	0	0	0	0	0	0	0	0	0	1	0	0	0	0	0	0	0	0	0	0	0	0	0	0	0	0	0	0	0
Suifenhe	0	0	0	0	0	0	0	1	0	0	0	0	0	0	0	0	0	0	0	0	0	0	0	0	0	0	0	0	0	0	0	0	0	0	0	0	0	0	0	0	0	0	0	0	0	0	0	0	0
Suiling	0	0	0	0	1	0	0	0	0	0	0	0	0	0	0	1	0	0	0	0	0	0	0	0	0	0	0	0	0	0	0	0	0	0	0	0	0	0	0	1	0	0	0	0	0	0	0	0	0
Sunwu	0	0	0	0	0	0	0	0	0	0	0	0	0	0	0	0	0	0	0	0	0	0	0	0	0	0	0	0	0	0	0	0	0	0	0	0	1	0	0	0	0	0	0	0	0	0	0	0	0
Tahe	0	0	0	0	0	0	0	0	0	0	0	0	0	0	0	0	1	0	0	0	0	0	0	0	0	0	0	0	0	0	0	0	1	0	0	0	0	0	0	0	0	0	0	0	0	0	0	0	0
Tailai	0	0	0	0	0	0	0	0	1	0	0	0	0	0	0	0	0	0	0	0	0	0	0	0	0	0	0	0	1	0	0	0	0	0	0	0	0	0	0	0	0	0	0	0	0	0	0	0	0
Tangyuan	0	0	0	0	0	0	0	0	0	0	0	0	0	0	0	0	0	0	1	0	0	0	0	0	0	0	0	0	0	1	0	0	0	0	0	0	0	0	0	0	0	0	0	0	0	0	0	0	0
Tieli	0	0	0	0	0	0	0	0	0	0	0	0	0	0	0	0	0	0	0	0	0	0	0	0	0	0	0	0	0	0	0	0	0	0	0	0	0	0	0	1	0	0	0	0	0	0	0	0	0
Tonghe	0	0	0	0	0	1	0	0	0	1	0	0	0	0	0	0	0	0	0	0	0	0	0	0	0	0	0	0	0	0	0	0	0	1	0	0	0	0	0	1	0	0	0	0	0	0	0	0	0
Tongjiang	0	0	0	0	0	0	0	0	0	0	1	1	0	0	0	0	0	0	0	0	0	0	0	0	0	0	0	0	0	0	0	0	0	0	0	0	0	0	0	0	1	0	1	0	0	0	0	0	0
Wangkui	0	0	0	0	0	0	0	0	0	0	0	0	0	0	0	1	0	0	0	0	0	0	0	0	0	1	0	0	0	0	0	0	0	0	0	0	0	0	1	0	0	0	0	0	0	0	0	0	0
Wuchang	0	0	0	0	0	0	0	0	0	0	0	0	0	0	1	0	0	0	0	0	0	0	0	0	0	0	0	0	0	0	0	0	0	0	0	0	0	0	0	0	0	1	0	0	0	0	0	0	0
Wudalianchi	0	0	0	0	1	0	0	0	0	0	0	0	0	0	0	0	0	0	0	0	0	0	0	1	1	0	0	0	0	0	0	0	0	0	0	1	1	0	0	0	0	0	0	0	0	1	0	0	0
Xuanke	0	0	0	0	1	0	0	0	0	0	0	0	0	0	0	0	0	0	0	0	0	0	1	0	0	0	0	0	0	0	0	0	0	0	0	0	0	0	0	0	0	0	0	0	1	1	0	0	0
Yanshou	0	0	0	0	0	1	0	0	0	1	0	0	0	0	0	0	0	0	0	0	0	0	0	0	0	0	0	0	0	0	0	0	0	0	0	0	0	0	0	0	0	1	0	0	0	0	0	0	0
Yian	0	0	1	0	0	0	0	0	0	0	0	0	1	0	0	0	0	0	0	0	0	0	0	0	1	0	1	0	0	0	0	1	0	0	0	1	0	0	0	0	0	0	0	0	0	0	0	0	0
Yilan	0	0	0	0	0	0	1	0	0	1	0	0	0	0	0	0	0	0	0	1	0	0	0	0	0	0	0	1	0	0	0	0	0	0	0	0	0	0	0	0	0	0	0	0	0	0	0	0	1
Youyi	0	0	0	1	0	0	0	0	0	0	0	1	0	0	0	0	0	0	0	0	0	1	0	0	0	0	0	0	0	0	0	0	0	0	0	0	0	0	0	0	0	0	0	0	0	0	0	0	0
Zhaodong	1	0	0	0	0	0	0	0	0	0	0	0	0	0	0	0	0	0	0	0	0	0	0	0	0	1	0	0	0	0	0	0	0	0	0	0	0	0	0	0	0	0	0	0	0	0	0	0	0
Zhaoyuan	0	0	0	0	0	0	0	0	1	0	0	0	0	0	0	0	0	0	0	0	0	0	0	0	0	0	0	0	0	0	0	0	0	0	0	0	0	0	0	0	0	0	0	0	0	0	0	0	0
Zhaozhou	1	0	0	0	0	0	0	0	0	0	0	0	0	0	0	0	0	0	0	0	0	0	0	0	0	0	0	0	0	0	0	0	0	0	0	0	0	0	0	0	0	0	0	0	0	0	0	0	0
[truncated: 14 more columns]
